# Supplementary material
Source: PubMed Central journal article supplement (PMC3399644)
Supplement: supp_the2011-0442_T11-442_Supplemental_Data_PACS_01.pdf [file supp_the2011-0442_T11-442_Supplemental_Data_PACS_01.pdf]

# PACS 01

Protocole Adjuvant  
dans le Cancer du Sein<sup>1</sup>

**A PHASE III STUDY EVALUATING THE BENEFIT OF  
DOCETAXEL GIVEN SEQUENTIALLY WITH FEC 100  
CHEMOTHERAPY TREATMENT IN AXILLARY LYMPH  
NODE-POSITIVE EARLY BREAST CANCER PATIENTS**

SPONSOR

Fédération Nationale des Centres de Lutte Contre le Cancer (FNCLCC)<sup>2</sup>

---

<sup>1</sup> Adjuvant Treatment of Breast Cancer

<sup>2</sup> French National Federation of Cancer Treatment Centers

**A Phase III Study Evaluating The Benefit Of Docetaxel Given  
Sequentially With FEC 100 Chemotherapy Treatment In Axillary  
Lymph Node-Positive Early Breast Cancer Patients**

March 18, 1997

VERSION 6

Approved by Ethics Committee/IRB on Feb. 17, 1997

## STUDY STEERING COMMITTEE

|                    |                                                                                                                 |                               |                    |
|--------------------|-----------------------------------------------------------------------------------------------------------------|-------------------------------|--------------------|
| <b>B. Asselain</b> | Statistician                                                                                                    | <b>Institut Curie</b>         | <b>Paris</b>       |
| <b>J.L. Canon</b>  | Representative of Belgian investigators                                                                         | <b>Charleroi</b>              | <b>Belgium</b>     |
| <b>P. Fumoleau</b> | Representative of Cancer Treatment Centers                                                                      | <b>Centre R. Gauducheau</b>   | <b>Nantes</b>      |
| <b>J.L. Misset</b> | Representative of University Hospital Centers and <i>Assistance Publique</i> <sup>1</sup>                       | <b>Hop. P. Brousse</b>        | <b>Villejuif</b>   |
| <b>A. Monnier</b>  | Representative of Hospital Centers and General Hospital Centers                                                 | <b>C.H. Bouloche</b>          | <b>Montbéliard</b> |
| <b>H. Roché</b>    | Chairman, Representative of the Committee For Medical Cooperation between Centers on Breast Cancer <sup>2</sup> | <b>Centre Cl. Regaud</b>      | <b>Toulouse</b>    |
| <b>D. Serin</b>    | Representative of private oncologists                                                                           | <b>Clinique Ste Clothilde</b> | <b>Avignon</b>     |
| <b>M. Spielman</b> | Representative of Cancer Treatment Centers                                                                      | <b>Institut G. Roussy</b>     | <b>Villejuif</b>   |

---

<sup>1</sup>*Assistance Publique* – In France, authority that manages the social services and state-owned hospitals in Paris and Marseille

<sup>2</sup> This committee is a special body within the network of French Cancer Treatment Centers

## LIST OF INVESTIGATORS

|                         |                                                                                          |                                             |
|-------------------------|------------------------------------------------------------------------------------------|---------------------------------------------|
| <b>Angers</b>           | Centre P. Papin<br>2, rue Moll - 49033 Cedex 01                                          | <b>Dr. Delva</b>                            |
| <b>Avignon</b>          | Clinique Ste Catherine<br>84082                                                          | <b>Dr. Serin</b>                            |
| <b>Bordeaux</b>         | Institut Bergonié<br>180, rue St Gênes - 33076                                           | <b>Dr. Mauriac</b>                          |
| <b>Caen</b>             | Centre F. Baclesse<br>route de Lion sur Mer<br>BP 5026 14021 Cedex                       | <b>Dr. Delozier</b>                         |
| <b>Clermont-Ferrand</b> | Centre J. Perrin<br>58, rue de Montalembert<br>63011 Cedex 01                            | <b>Prof. Chollet,<br/>Dr. Ferrière</b>      |
| <b>Dijon</b>            | Centre G.F. Leclerc<br>Rue du Professeur Marion<br>BP 1544 - 21034 Cedex                 | <b>Dr. de Ghislain,<br/>Dr. Fargeot</b>     |
| <b>Lille</b>            | Centre O. Lambret<br>Rue F. Combemale<br>59020 Cedex                                     | <b>Prof. Bonneterre,<br/>Dr. Bonneterre</b> |
| <b>Lyon</b>             | Centre L. Berard<br>28, rue Laennec<br>69373 Cedex 08                                    | <b>Prof. Bremond,<br/>Dr. Guastalla</b>     |
| <b>Marseille</b>        | Institut Paoli Calmettes<br>232, bd Ste Marguerite<br>13273 Cedex 09                     | <b>Dr. Viens</b>                            |
| <b>Montbéliard</b>      | C.H. Bouilloche - 25209                                                                  | <b>Dr. Monnier</b>                          |
| <b>Montpellier</b>      | Centre Val d'Aurelle<br>326, rue des Apothicaires<br>Parc Euromédecine<br>34298 Cedex 05 | <b>Dr. Roumieu</b>                          |
| <b>Nancy</b>            | Centre P. Vautrin<br>Av. de Bourgogne<br>54511 Vandoeuvre-les-Nancy Cedex                | <b>Dr. Luporsi</b>                          |

|                    |                                                                     |                                          |
|--------------------|---------------------------------------------------------------------|------------------------------------------|
| <b>Nantes</b>      | Centre R. Gauducheau<br>Bd J. Monod<br>44805 St Herblain Cedex      | <b>Dr. Fumoleau</b>                      |
| <b>Nice</b>        | Centre A. Lacassagne<br>33, Av de Vallombrose<br>06054 - Cedex 1    | <b>Prof. Namer</b>                       |
| <b>Paris</b>       | Institut Curie<br>26, rue d'Ulm<br>75231 Cedex 05                   | <b>Prof. Pouillard</b>                   |
| <b>Rennes</b>      | Centre E. Marquis<br>Pontchaillou 35062 Cedex                       | <b>Prof. Kerbrat</b>                     |
| <b>Rouen</b>       | Centre H. Becquerel<br>Rue d'Amiens<br>76038 Cedex                  | <b>Dr. Julien</b>                        |
| <b>Saint-Cloud</b> | Centre R. Huguenin<br>35, rue Dailly - 92210                        | <b>Dr. Tubiana-Hulin</b>                 |
| <b>Strasbourg</b>  | Centre P. Strauss<br>3, rue de la Porte de l'Hôpital<br>67085 Cedex | <b>Dr. Cutuli,<br/>Dr. Petit</b>         |
| <b>Strasbourg</b>  | Hospices Civils<br>Services de Gynécologie et d'Oncologie<br>67000  | <b>Prof. Bergerat,<br/>Prof. Brettes</b> |
| <b>Toulouse</b>    | Centre C. Regaud<br>20, rue de Pont St-Pierre<br>31052 Cedex        | <b>Dr. Roche</b>                         |
| <b>Villejuif</b>   | Institut G. Roussy<br>39, rue C. Desmoulins<br>94805 Cedex          | <b>Dr. Spielman,<br/>Dr. Dohollou</b>    |



## SYNOPSIS - PROTOCOL

|                                                                                                  |                                                                                                                                                                                                                              |
|--------------------------------------------------------------------------------------------------|------------------------------------------------------------------------------------------------------------------------------------------------------------------------------------------------------------------------------|
| <b>TITLE:</b>                                                                                    | A Phase III Study Evaluating The Benefit Of Docetaxel Given Sequentially With FEC 100 Chemotherapy Treatment In Axillary Lymph Node-Positive Early Breast Cancer Patients                                                    |
| <b>THERAPEUTIC INDICATION:</b>                                                                   | Axillary lymph node-positive early breast cancer                                                                                                                                                                             |
| <b>OBJECTIVES:</b>                                                                               | To evaluate the contribution to disease-free survival and overall survival of docetaxel administered in combination with an anthracycline in axillary lymph node-positive early breast cancer patients with poor prognosis.  |
| <b>STUDY DESIGN:</b>                                                                             | Phase III, randomized, open-label trial.                                                                                                                                                                                     |
| <b>PLANNED NUMBER OF PATIENTS:</b>                                                               | 1598                                                                                                                                                                                                                         |
| <b>NUMBER OF STUDY CENTERS:</b>                                                                  | 50                                                                                                                                                                                                                           |
| <b>DURATION OF STUDY:</b>                                                                        | Three years of subject enrolment, eight years until the first evaluation.                                                                                                                                                    |
| <b>SELECTION CRITERIA:</b>                                                                       | Women less than 65 years of age with unilateral axillary lymph node-positive early breast cancer and poor prognosis.                                                                                                         |
| <b>EFFICACY CRITERIA</b>                                                                         |                                                                                                                                                                                                                              |
| <ul style="list-style-type: none"> <li>• <b>PRIMARY:</b></li> <li>• <b>SECONDARY:</b></li> </ul> | <p>Five-year disease-free survival.</p> <p>Five-year survival / Cost effectiveness, quality of life.</p>                                                                                                                     |
| <b>STUDY CONDUCT:</b>                                                                            | After surgery, the patients will be randomly assigned to receive either 6 cycles of FEC <sup>1</sup> 100 or 3 cycles of FEC 100 followed by 3 cycles of docetaxel. Treatment will be completed by locoregional radiotherapy. |
| <b>STATISTICAL ANALYSIS:</b>                                                                     | Five-year disease-free survival increased by at least 7.5% (65% vs 72.5%) with a significance level of 5% and a $\beta$ level of 10%. Planned sample size: 1598 patients.                                                    |
| <b>SPONSOR:</b>                                                                                  | Fédération Nationale des Centres de Lutte Contre le Cancer (French National Federation of Cancer Treatment Centers), referred to as FNCLCC in this document.                                                                 |

---

<sup>1</sup> FEC: Chemotherapy regimen including fluorouracil, epirubicin and cyclophosphamide

# **TABLE OF CONTENTS**

**1 - INTRODUCTION**

**2 - RATIONALE**

**3 - STUDY OBJECTIVES**

**4 - DEFINITION OF DISEASE / SELECTION OF PATIENTS**

**5 - BASELINE ASSESSMENT**

**6 - STUDY CONDUCT**

**7 - POST-TREATMENT FOLLOW-UP**

**8 - STATISTICAL CONSIDERATIONS**

**9 - STUDY ORGANIZATION**

**10 - PUBLICATION OF RESULTS**

**11 - ADDITIONAL STUDIES**

**12 - REFERENCES**

**13 - PROTOCOL APPENDICES**

## 1 - INTRODUCTION

Although adjuvant treatments have improved the prognosis of breast cancer, the actual benefit remains below the expectations of both physicians and patients. The most recent Oxford meta-analysis showed an absolute gain of less than 10% after 10 years. The relative gain with reference to a population with the same prognosis is approximately 30% for disease-free survival and 20% for overall survival, respectively. So far, the various attempts to improve the efficacy of chemotherapy have resulted in limited benefit to the patients, whether they involve increases in dose intensity, addition of anthracyclines, or regimens combining chemotherapy and hormone therapy. There is new hope since taxanes have been confirmed to be effective in metastatic disease. The time has come to evaluate the benefit of these new compounds in adjuvant treatment. The objective of the present study is to compare a conventional chemotherapy regimen used alone or in combination with docetaxel.

## 2 - RATIONALE

### 2-1 REVIEW OF ADJUVANT TREATMENTS (META-ANALYSIS)

#### **BASIS FOR THE TRIAL: the value of adjuvant chemotherapy**

##### **2-1-1. *It has now been clearly established that systemic adjuvant chemotherapy can increase survival in patients with axillary lymph node-positive breast cancer after definitive complete surgery.***

Starting in the 1970s, randomized clinical trials of combination chemotherapy regimens carried out by Bonadonna et al. (12 CMF<sup>1</sup>) (1) and the National Surgical Adjuvant Breast and Bowel Project (NSABP) (2) showed that adjuvant chemotherapy could be beneficial in premenopausal patients with positive axillary lymph nodes. This positive effect on survival was not observed in postmenopausal patients. This was attributed to the fact that the older women were given a lower dose.

The second trial carried out by Bonadonna et al. compared CMF given either in 12 cycles or in 6 cycles (3). Treatment over 6 months proved to be as effective as 12 months of chemotherapy in both pre- and postmenopausal women. Further studies confirmed that a chemotherapy regimen administered for over six months did not prove more effective than treatment for only six months (4,5,6,7).

---

<sup>1</sup> CMF: Cyclophosphamide, Methotrexate and Fluorouracil



## 2-1-2 The meta-analysis (8)

The analysis published in 1992 covered 133 randomized trials started between 1957 and 1985, involving more than 75 000 patients with stage I/II breast cancer treated by chemotherapy and/or hormone therapy or a biological response modifier.

### Adjuvant chemotherapy

The analysis of randomized trials investigating chemotherapy (11 000 patients) showed the superiority of adjuvant combination chemotherapy which significantly reduced the yearly risk of recurrence ( $28\% \pm 3$ ) and death ( $16\% \pm 3$ ). Treatment proved equally effective irrespective of the lymph node status (N+ or N-). While the reduction in the yearly risk of death remained significant in patients 50 to 69 years of age, it was approximately 50% less than that observed in premenopausal patients. For axillary lymph node-positive patients, prolonged combination chemotherapy (4 to 6 months) proved more effective than brief perioperative chemotherapy.

### Adjuvant hormone therapy

The analysis of randomized trials with tamoxifen (30 000 patients) showed that this treatment can significantly reduce the yearly risk of recurrence ( $25\% \pm 2$ ) and death ( $17\% \pm 2$ ). Again, treatment was shown to be equally effective irrespective of the lymph node status (N+ or N-). The analysis published in 1992 showed that only postmenopausal patients derived benefit from this treatment whatever the estrogen receptor status (ER+ or ER-). The findings of a very recent analysis (1995) which has not yet been published differ appreciably: while adjuvant hormone therapy was found to be beneficial in terms of survival in ER+ patients under 50 years of age, this positive effect was of little significance for ER- patients over 50 years of age. Premenopausal castration significantly decreased the yearly risk of recurrence ( $26\% \pm 6$ ) and death ( $25\% \pm 7$ ). However, no comparison can be made between reductions in yearly risks obtained with adjuvant chemotherapy and those resulting from adjuvant castration. The control curves (untreated groups), which do not coincide, represent populations with very different prognoses.

### Adjuvant chemotherapy and hormone therapy

In patients 50 to 69 years of age, it appears that the benefit in terms of recurrence is greater when chemotherapy is combined with tamoxifen than when hormone therapy or chemotherapy are used alone. In terms of overall survival, the yearly risk of death was reduced in N+ and N- patients, but the absolute gain after 10 years in N+ patients was twice that of N- patients. A recent analysis (1995, not yet published) of survival rates in patients under 50 years of age found no significant positive effect of combining chemotherapy with castration *versus* chemotherapy alone.

Although the findings of the meta-analysis are positive and significant, they nonetheless remain moderate, showing absolute gains in survival after 10 and 15 years consistently less than 10%. These modest results must be improved using different approaches, including the contribution of new cytotoxic agents.

## 2 - 2 ANTHRACYCLINES

### 2-2-1 Anthracyclines and advanced breast cancer

The treatment of advanced disease remains palliative whereas the objective of adjuvant treatment is to cure. Consequently, the most effective treatment of metastatic disease must be provided in an adjuvant setting. Anthracyclines are among the most active products in advanced breast cancer and of four of the largest trials on the use of these agents in this situation, three have shown that the FAC regimens (fluorouracil, Adriamycin, cyclophosphamide) are significantly superior to CMF regimens (cyclophosphamide, methotrexate, fluorouracil) in terms of response rates, time to progression and survival. Bonadonna et al. evaluated the following sequential treatment in 42 patients: four cycles of doxorubicin (Adriamycin), 75 mg/m<sup>2</sup> every three weeks, followed by eight cycles of CMF. After four doxorubicin cycles, the response rate was 76% including 17% complete responses. After CMF, four partial responses and one minor response became complete responses.

### 2-2-2 Use of anthracyclines in an adjuvant setting

In view of these data on advanced disease, it would seem logical to use anthracyclines in an adjuvant setting. However, many investigators have hesitated to take this step because of the risk of cumulative cardiotoxicity related to long-term administration of doxorubicin. The maximum recommended cumulative dose is 550 mg/m<sup>2</sup>. The demonstration of a lack of benefit from adjuvant treatment for more than six months and the availability of epirubicin, which is less cardiotoxic at an equimolar dose (recommended cumulative dose: 1000 mg/m<sup>2</sup>), have changed this situation.

### 2-2-3 Trials showing benefit from the use of anthracyclines in an adjuvant setting

- *An initial trial (707 patients) carried out by the NSABP, B 11 (9)* showed that combining melphalan, fluorouracil, and Adriamycin was more effective in so-called “tamoxifen-resistant” patients than the same regimen without Adriamycin.
- *A second trial by the same group (NSABP), B 15 (10)* compared four cycles of an AC regimen (Adriamycin, 60 mg/m<sup>2</sup>, cyclophosphamide, 600 mg/m<sup>2</sup>, administered in 63 days) with six cycles of CMF. There was no significant difference in disease-free survival or overall survival between the two regimens. Because of the shorter duration of the AC regimen and its lower toxicity, this four-cycle chemotherapy is currently the reference treatment for the NSABP.

- ***In a French randomized trial (Misset et al., 1992) (11)***, a 12-cycle AVCF regimen (Adriamycin, vincristine, cyclophosphamide, fluorouracil) was compared with a 12-cycle regimen without anthracyclines (CMF). After ten years, overall and disease-free survival were significantly better in premenopausal patients who received the regimen with anthracyclines, but there was no difference between the two arms consisting of postmenopausal patients. In premenopausal patients who had received an anthracycline, the risk of recurrence within ten years was reduced by one-third and the risk of death by one-half.
- ***Another trial carried out by Bonadonna et al. (12)*** was based on the limited efficacy of the CMF regimen for patients with more than three positive lymph nodes, on the activity of Adriamycin in advanced disease, and on the group's experience with alternating chemotherapies in Hodgkin's disease. For these reasons, two types of regimen each involving combinations without cross-resistance were tested, i.e. four doxorubicin cycles followed by eight CMF cycles (sequential regimen) *versus* two CMF cycles alternated with one doxorubicin cycle (alternated regimen). The results obtained in 403 evaluable patients showed that the sequential regimen was superior in terms of both disease-free survival ( $p = 0.002$ ) and overall survival ( $p = 0.002$ ). This benefit was demonstrated in all the subgroups. Median disease-free survival was practically doubled, i.e. 86 months in the sequential arm *versus* 47 months in the alternated arm. This benefit may in fact be related to the sequence rather than the addition of doxorubicin. Four cases of heart failure (1%) were reported, two of which were toxicity-related deaths.
- ***A trial by "Institut Curie" (13)*** in premenopausal patients compared an MMAC regimen (methotrexate, mitomycin, doxorubicin, cyclophosphamide) with an MMFC regimen (methotrexate, mitomycin, fluorouracil, cyclophosphamide). A significant increase in survival was reported for the doxorubicin group.
- ***The International Collaborative Cancer Group (ICCG)*** recently published (14) the results of a phase III randomized trial (759 premenopausal axillary lymph node-positive patients) comparing CMF 1 *versus* FEC 1 or CMF 2 *versus* FEC 2, depending on the participating study centers. With a median survival of four years and less, there was a significant difference in overall survival ( $p = 0.02$ ) and disease-free survival ( $p = 0.03$ ) in favor of the group receiving epirubicin (FEC 2).

#### **2-2-4 Trials not showing benefit from the use of anthracyclines in an adjuvant setting**

- *In a study by the NSABP, B 12 (9)* performed in “tamoxifen-sensitive” patients, the combination of melphalan, fluorouracil, tamoxifen, and Adriamycin was not shown to be superior to the same regimen without Adriamycin.
- *The Milan group (Moliteri, Bonadonna et al.) (15)* compared 12 cycles of CMF with 8 cycles of CMF followed by 4 cycles of AV (Adriamycin, vincristine) in patients with one to three positive lymph nodes. No significant difference was found between the two arms. In fact, the study did not show a lack of benefit from doxorubicin itself but rather that introducing doxorubicin after eight cycles of CMF was of no value.
- *The Southeastern Cancer Study Group (SECSG) (16)* conducted a randomized trial in 528 axillary lymph node-positive patients comparing six cycles of either CMF or CAF. In this trial, the doses of cytotoxic agents were changed in the two arms and in each cycle to obtain identical dose intensity. After five years, no significant differences were found between the two groups (the benefit obtained with the CAF regimen was less than 10%).

The role of anthracyclines in the adjuvant treatment of advanced disease remains a controversial subject. Nevertheless, the latest meta-analysis appears to confirm that they may be beneficial.

#### **2 - 3 TAXANES IN METASTATIC PATIENTS**

The taxanes are a new group of anticancer agents now including two commercially available agents, paclitaxel and docetaxel. Taxanes have a novel mechanism of cytotoxic action and are the most active antineoplastic agents to become available in recent years.

In phase II trials, among the many types of tumors found to be sensitive to taxanes in terms of tumor regression, the highest response rates have been obtained in breast cancer, making taxanes the most active anticancer agents in this disease.

## **Paclitaxel**

Paclitaxel has been administered as a single agent to patients with metastatic breast cancer at different doses and under varying administration conditions (infusion times). It has also been used in populations differing in the number of previous lines of chemotherapy. Objective response rates ranged from 18% (150 mg/m<sup>2</sup> for 24 h, with three previous lines of chemotherapy; Holmes, MDACC) to 62% (250 mg/m<sup>2</sup> for 24 h, first-line chemotherapy; Reichman, MSKCC) (17-18). The large variability of response rates observed is not accidental. It is partly due to the differences in the populations treated, particularly in terms of resistance or previous treatments, but also because paclitaxel is highly dependent on the administration conditions in heavily pretreated patients, i.e. responses have been obtained using prolonged infusion after the failure of other conditions (19).

The absence of cross-resistance between paclitaxel and anthracyclines was clearly demonstrated in these trials (20). Paclitaxel has been studied in combination with many cytotoxic agents in various tumors (17,18). In breast cancer, it can be combined with vinorelbine in a conventional regimen with or without growth factors, and with high-dose alkylators in intensified regimens supported by hematopoietic growth factors.

The paclitaxel + Adriamycin combination has been investigated in the largest number of trials and is the most promising combination (17,18,21). The most important information obtained in these trials is as follows:

- The effect of the treatment regimen on toxicity remains open to discussion, i.e. in the first trial by M.D. Anderson (18), the paclitaxel-doxorubicin sequence was clearly more toxic than the opposite sequence studied by the NCI. The sequence with doxorubicin followed by paclitaxel then became the recommended order. However, recent information tends to put the role of the sequence more in perspective (21).
- In women who had never received chemotherapy of any type, the combination of paclitaxel and doxorubicin induced heart failure with clinical signs in a large number of cases (18%) (21).
- The response rates in chemotherapy-naive patients were particularly high, i.e. 94% objective responses (CI: 79-99) including 41% showing complete response (CI: 24-59), which seems to confirm the potential major role of the doxorubicin + taxane combination in the treatment of breast cancer.

## **Docetaxel**

Docetaxel, a more recently used semisynthetic analog, is now a major agent in breast cancer. Its activity has also been demonstrated in other types of cancer (lung, pancreas, and ENT). Its *in vitro* spectrum of activity is similar to that of paclitaxel.

Since the docetaxel formulation does not require Cremophor<sup>1</sup>, the incidence of anaphylactic reactions is lower than that of paclitaxel. On the other hand, it has its own toxicities such as skin manifestations, edema and serous effusions. The phase I trials investigating different treatment schedules (24-h infusion for five consecutive days or weekly) showed that there was no significant correlation between the duration of the infusion, efficacy, and bone-marrow suppression, resulting in only one recommended regimen: i.e. 100 mg/m<sup>2</sup> in a 1-h infusion every three weeks as single-agent chemotherapy. Many European and American phase II trials using single-agent chemotherapy were rapidly initiated and resulted in two major findings: the first was the clear dose-response relationship for docetaxel (40% objective response in a Japanese trial with 60 mg/m<sup>2</sup>, 72% in an initial EORTC trial with 100 mg/m<sup>2</sup> and 53% response in a second trial with 75 mg/m<sup>2</sup>). The second major finding was the significant activity of docetaxel in patients previously resistant to anthracyclines (M.D. Anderson: 55% objective response). Taken together, all the phase II trials showed a response rate of 58.1% in patients not previously treated and 57.1% in previously treated patients. In the same groups, median survival was 15 and 11 months, respectively (22).

Docetaxel has also been studied in combination with other cytotoxic agents in advanced breast cancer, i.e. vinorelbine (23), doxorubicin, Cisplatin, cyclophosphamide and fluorouracil. The various trials suggest that the docetaxel + doxorubicin combination is highly effective as first-line chemotherapy in metastatic disease.

A French phase I trial using this combination for this indication in 42 evaluable patients came to the following conclusions: the dose-limiting toxicity is essentially hematologic effects. No symptoms of cardiotoxicity were observed. The recommended dose is 75 mg/m<sup>2</sup> for docetaxel and 50 mg/m<sup>2</sup> for doxorubicin. At this dose level, nine out of ten patients showed objective response, including five of the six patients with liver metastases and four of the five patients with bone metastases (24).

These encouraging results should prompt the comparison of this combination with more conventional regimens involving anthracyclines.

---

<sup>1</sup> a polyethoxylated castor oil vehicle

## 2 - 4 HORMONE THERAPY

The choice of adjuvant treatment for breast cancer is based on the data from the meta-analysis of all the randomized trials using hormone therapy, chemotherapy, and immunotherapy, which alone provides an overall view of the therapeutic effects (8). Suppression of ovarian secretion (castration) improves survival in premenopausal patients: the difference in 15-year survival was 10.2% ( $\pm$  2.7) higher in castrated patients (25% relative reduction in yearly mortality). The effect was smaller if chemotherapy was used in combination with this treatment, but not significantly.

*The reduction was pronounced and highly significant for axillary lymph node-positive patients (13  $\pm$  3.6% after 15 years). It was smaller and at the limit of significance for patients with negative lymph node status.*

Combination with chemotherapy provided no benefit. Administration of tamoxifen as adjuvant treatment improved survival to a similar extent as chemotherapy (6.2 and 6.3% after ten years, respectively). The benefit was more pronounced in older women and in those with higher hormone receptor levels. The results in the literature do not provide evidence of interactions between tamoxifen and chemotherapy. In premenopausal patients, the benefit of adjuvant treatment is the same whether chemotherapy is administered alone or in combination with tamoxifen, and the standard treatment remains chemotherapy alone. In postmenopausal patients, the standard treatment is tamoxifen. However, the benefit provided by tamoxifen is improved by chemotherapy. This result is supported by a large randomized trial (NSABP B-15) which demonstrated improved survival for patients receiving combined therapy. Certain theoretical and experimental data suggest a possible interaction between anticancer agents and tamoxifen administered concomitantly, i.e. antagonism with fluorouracil, cyclophosphamide, and melphalan, and synergism with Adriamycin (Osborne, 1994). This may explain the unfavorable results obtained with the combination of chemotherapy and tamoxifen in certain randomized trials (NSABP: fluorouracil + melphalan  $\pm$  tamoxifen), SWOG (cyclophosphamide, methotrexate, fluorouracil, vincristine, prednisone  $\pm$  tamoxifen) or favorable results in the NSABP trial combining Adriamycin and cyclophosphamide  $\pm$  tamoxifen. Firm conclusions cannot be drawn from these results.

## 2 - 5 JUSTIFICATION OF THE CHOSEN DOSAGE REGIMEN

### 2-5-1 FEC 100 DOSAGE REGIMEN

The *Groupe Français d'Etudes Adjuvantes*<sup>1</sup> (GFEA) has worked on the use of epirubicin in the treatment of breast cancer for several years. Two trials in patients with metastatic disease (25, 26) showed equivalent efficacy and lower toxicity with equimolar doses of Adriamycin and epirubicin. Raising the epirubicin doses to 75 mg/m<sup>2</sup> and 100 mg/m<sup>2</sup> in the FEC regimen increased the response rate and time to progression without prolonging survival (27, 28).

Adjuvant treatment in premenopausal axillary lymph node-positive patients showed better results with three cycles of FEC 75 than with three cycles of FEC 50, but significantly poorer results than with six cycles of FEC 50 (GFEA 01, 29). More recently, trial GFEA 05 compared six cycles of FEC 50 with six

---

<sup>1</sup> French Adjuvant Trial Group

cycles of FEC 100. The patients were under 65 years of age with more than four involved lymph nodes, or one to three involved lymph nodes but with negative hormone receptors and a histological grade of 2 or 3. Tamoxifen was given to all the postmenopausal patients for three years. Five hundred sixty-five women were enrolled over 37 months, of whom 497 were both eligible and evaluable (30). The first interim analysis, corresponding to a median follow-up of 30 months, demonstrated the following points:

- The dose intensity received was 94.1% and 92.2% with FEC 50 and FEC 100, respectively (NS).
- The incidence of grade 3 and 4 neutropenia was 9.6% and 1.2%, respectively, with FEC 50 and 16.1% and 8.0% with FEC 100 ( $p = 0.001$ ). Cumulative incidences of grade 3 and 4 neutropenia ranged from 4.5% in cycle 1 to 10.3% in cycle 4.
- The incidence of grade 3 infection was 0% with FEC 50 and 3% with FEC 100. No deaths occurred during the trial.
- FEC 100 was found to be more toxic in terms of nausea and vomiting, stomatitis, and alopecia. Two patients in the FEC 50 arm experienced grade 1 cardiotoxicity and three patients in the FEC 100 arm, including one with grade 2 toxicity.
- The rates of relapse and death were 32% and 15.6%, respectively, with FEC 50 and 22% and 12.5% with FEC 100. Three-year disease-free survival was 62.1% with FEC 50 and 70.5% with FEC 100 ( $p = 0.02$ ).

Currently, and with all the reservations associated with short-term interim analyses, the experience of this group logically indicates 6 cycles of FEC 100 as the reference treatment.

### 2-5-2 FEC-T<sup>1</sup>

A trial involving a combination of epirubicin (E) and docetaxel (T) was originally intended. A phase I/II trial with this combination has recently shown major hematological toxicity both in the short term and cumulatively (unpublished data). Preliminary data obtained at a dose level of 75 mg/m<sup>2</sup> for the Taxotere + epirubicin combination do not currently support the use of this regimen in a phase III adjuvant trial. The same is true for the combination regimen using a 75 mg/m<sup>2</sup> dose of Taxotere and a 90 mg/m<sup>2</sup> dose of epirubicin.

Thus, a sequential T-FEC regimen is required:

- The toxic profile of docetaxel used as single-agent chemotherapy at 100 mg/m<sup>2</sup> in metastatic disease is well known. The dose-limiting toxicity is hematologic effects. Grade 3 and 4 neutropenia was found in 56.4% of the cycles and 76.4% of the patients. However, episodes of severe infection were rare (1.4% of the cycles) and the incidence of toxicity-related deaths was 1.7% (including the compassionate-use trial involving nearly 1000 patients).

---

<sup>1</sup> FEC-T: Fluorouracil, epirubicin and cyclophosphamide combination + Taxotere (i.e. docetaxel)



The risk of allergy was well managed with corticosteroids alone. Under corticosteroid therapy, fluid retention only occurred with corticoids starting at a median received dose of 400 mg/m<sup>2</sup>. Using 300 mg/m<sup>2</sup>, less than 5% of the patients experienced this toxicity.

- The treatment schedule therefore must be based on the following findings:
  - Responses to docetaxel in metastatic disease occur both in patients sensitive and refractory to anthracyclines.
  - MDR resistance is not considered to be a usual mechanism of docetaxel failure.

### 3 - TRIAL OBJECTIVES

**Primary** - to evaluate the effect of docetaxel in an adjuvant setting on five-year disease-free survival in women with early breast cancer and positive axillary lymph nodes.

**Secondary**

- to evaluate the impact on survival,
- to evaluate the different components of disease-free survival,
- to study the safety of this treatment *versus* conventional therapy,
- to evaluate the relationship of cost-effectiveness and quality of life,
- to assess the prognostic and predictive factors of treatment efficacy.

### 4 – DEFINITION OF DISEASE / SELECTION OF PATIENTS

#### 4 - 1 DEFINITION OF DISEASE

The study will focus on early breast cancer with positive axillary lymph nodes, first treated by definitive complete surgery.

#### 4 - 2 INCLUSION CRITERIA

All the following conditions must be satisfied:

- **Confirmed axillary lymph node involvement (N>1)**
- **women over 18 and under 65 years of age**
- **patients with a performance status < 2 on the WHO scale**
- **histologically confirmed unilateral adenocarcinoma of the breast (of any type)**
- **initial clinical presentation allowing definitive complete surgery**
- **absence of clinically or radiologically detectable metastases**
- **satisfactory initial surgical excision**
- **homolateral axillary lymph node dissection with at least five dissected lymph nodes**
- **initiation of chemotherapy before day 28 (day 42 in the event of reoperation)**
- **patient's written informed consent.**

### 4 - 3 EXCLUSION CRITERIA

The patient will be excluded from the study if any of the following criteria is satisfied:

- **Metastasis of any kind (including a homolateral supraclavicular lymph node)**
- **pregnant women or women of childbearing potential not using adequate contraception,**
- **any tumor graded <sup>3</sup> T4a (UICC staging system 1987), i.e. cutaneous involvement, deep adhesion, inflammatory breast,**
- **any chemotherapy, hormone therapy, or radiotherapy prior to surgery,**
- **tumor residue present (insufficient resection of in situ or invasive carcinoma).**
- **any unexplored, suspect clinical or radiological lesion of the contralateral breast.**
- **history of invasive cancer of the breast or elsewhere (except for cervical carcinoma in situ and basal cell carcinoma of the skin)**
- **contraindication to anthracyclines (LVEF determined by radionuclide scan or echocardiographic findings below the normal limits for the center)**
- **neutrophil count  $< 2 \times 10^9/l$  or platelets  $< 100 \times 10^9/l$**
- **abnormal liver function tests:**
  - transaminases  $> 1.5 \times \text{ULN}$  and alkaline phosphatase  $> 2.5 \times \text{ULN}$**
  - or**
  - total bilirubin  $> \text{ULN}$**
- **confirmed chronic hepatitis B or C, positive HIV test**
- **chronic physical or mental disease that could be detrimental to treatment or affect patient compliance,**
- **patients who, for family, social, geographic, or psychological reasons, cannot be adequately followed up.**

## 5 - BASELINE ASSESSMENT

### 5-1 CLINICAL

- History of the disease
- Evaluation of performance status (WHO index)
- Complete physical examination

### 5-2 LABORATORY

- Complete blood count, platelet count
- Liver function tests: transaminases, alkaline phosphatase, total bilirubin
- Serum creatinine, fasting serum glucose, serum calcium.

### 5-3 ADDITIONAL TESTS

- Left VEF using radionuclide scan or echocardiography
- Mammography of contralateral breast (if not performed before surgery)
- Chest X-ray
- Liver ultrasonography
- Bone scan (with centered images in the event of high uptake)

### 5-4 OBLIGATORY HISTOPATHOLOGY (see appendices)

The report will be appended to the case report form:

- Size, type, and staging (SBR<sup>1</sup>) of the tumor
- Quality of the excision, appearance of surgical margins
- Presence of carcinoma in situ
- Vascular or lymphatic emboli
- Number of dissected and positive lymph nodes
- Presence of capsule rupture
- Estrogen and progesterone receptor assay (biochemical and immunohistochemical assays are acceptable).

**IT IS ADVISABLE TO STORE A TUMOR SAMPLE AND A SERUM ALIQUOT IN LIQUID NITROGEN** (these samples will be used in the additional studies on prognostic factors).

---

<sup>1</sup> Scarff, Bloom, and Richardson classification

## **5 - 5 SURGICAL OPTIONS**

Surgical treatment will depend on clinical criteria. Conservative surgery or mastectomy is the surgeon's choice, but the operation must not leave infiltrating or intraductal residue on the surgical margins, or microcalcifications, or any other suspicious lesions visible on the reference mammography. If possible, lymph node dissection should be carried out simultaneously to avoid delaying the initiation of adjuvant treatment.

If the surgical margins are positive, reoperation is acceptable as soon as possible to avoid delaying the initiation of chemotherapy.

In any event, no residual lesion should remain when adjuvant chemotherapy is instituted (see Section 4-3).

## 6 - STUDY CONDUCT

This is a randomized multicenter open-label phase III trial in which all the therapeutic phases are predefined, obligatory, and specified in the present document. The trial will compare conventional chemotherapy involving six cycles of FEC 100 with a sequential treatment involving three cycles of FEC 100 and three cycles of docetaxel (Taxotere).

### 6-1 ENROLMENT IN THE TRIAL

Once the patient has been considered eligible, she will be informed of the study conditions and must give her informed consent in writing before the first cycle of chemotherapy. Enrolment in the trial will be effective starting on the randomization date. An inclusion number will be attributed after informed consent is obtained.

### 6-2 RANDOMIZATION

Randomization will take place after all the inclusion and exclusion criteria have been verified.

*It will be done by telephone or fax:*

- at 01 45 83 93 94 until 31 December 1997
- at 01 44 23 04 69 starting on 1 January 1998

Office hours: 9 a.m. to 5 p.m. Monday to Friday. The following basic information will be requested:

- Name of the center and physician in charge
- Patient's initials, age, and record number
- Number of positive lymph nodes
- Dates of surgery and informed consent (photocopy required: name blacked out, initials)

Randomization and the chosen therapeutic option will be confirmed by fax.

*Randomization will be stratified:*

- by center
- according to age ( $\geq$  or  $<$  50 years of age)
- according to the number of positive lymph nodes (1 to 3,  $>$  3) between:

**ARM A: SIX CYCLES OF FEC 100**

**ARM B: THREE CYCLES OF FEC 100  
then THREE CYCLES OF DOCETAXEL 100**

### 6-3 TREATMENT

- Six (6) cycles of chemotherapy will be administered at three-week intervals.
- The first treatment will be given no later than postoperative day 28.
- The doses and treatment regimens are as follows:

#### **TREATMENT A:**

|                    |                       |
|--------------------|-----------------------|
| FLUOROURACIL:      | 500 mg/m <sup>2</sup> |
| EPIRUBICIN:        | 100 mg/m <sup>2</sup> |
| CYCLOPHOSPHAMIDE : | 500 mg/m <sup>2</sup> |

#### **TREATMENT B:**

##### **3 CYCLES OF**

|                   |                       |
|-------------------|-----------------------|
| FLUOROURACIL:     | 500 mg/m <sup>2</sup> |
| EPIRUBICIN:       | 100 mg/m <sup>2</sup> |
| CYCLOPHOSPHAMIDE: | 500 mg/m <sup>2</sup> |

##### **THEN 3 CYCLES OF**

|            |                       |
|------------|-----------------------|
| DOCETAXEL: | 100 mg/m <sup>2</sup> |
|------------|-----------------------|

(for premedication and corticosteroid therapy, see Section 6-4-2)

### 6 - 4 TREATMENT SCHEDULES

#### **6-4-1 FEC 100 regimen**

The anticancer agents will be administered by slow i.v. injection via infusion tubing delivery 5% dextrose solution at a high flow rate.

#### **6-4-2 Docetaxel regimen**

The infusion will be given via the strict i.v. route for 1 hour every three weeks. The use of cold caps is voluntary. Premedication is routinely administered starting with the first cycle and in all the subsequent cycles with:

- Prednisolone (Solupred<sup>®</sup>) 60 mg orally at -12 h, -3 h, and - 1 h, i.e. on the previous evening, in the morning and one hour before the docetaxel infusion, and then 60 mg every 12 hours on the following two days (+12 h, +24 h, +36 h), i.e. a total of six doses.

#### **OR**

- Methylprednisolone (Medrol<sup>®</sup>) 48 mg each time according to the same conditions as above.

## 6 - 5 CONDITIONS FOR CONTINUING CHEMOTHERAPY

### 6-5-1 In each cycle

The treatment is administered every 21 days if the neutrophil count is  $> 1.5 \times 10^9/l$  and platelet count  $> 100 \times 10^9/l$ .

On each day 21 in the cycles, a complete blood count and liver function tests (transaminases, total bilirubin, alkaline phosphatase) will be carried out.

### 6-5-2 Planned changes

#### **In the event of bone marrow suppression:**

On day 21, if the neutrophil count is  $< 1.5 \times 10^9/l$  or platelet count  $< 100 \times 10^9/l$ , the treatment will be delayed for eight days and resumed with co-administration of filgrastim at a dose of  $5 \mu g/kg$  in all the remaining cycles. In arm B, the full docetaxel dose will always be given in the first cycle.

On day 28, if the neutrophil or platelet count precludes treatment, the patient will be withdrawn from the study.

#### **In the event of bone marrow aplasia with fever:**

Definition: fever  $> 38^{\circ}5$  in a period of bone marrow hypoplasia (**granulocytes  $< 0.5 \times 10^9/l$  requiring antibiotic therapy or lasting more than 24 h**). The treatment will be continued at the same doses but with concomitant administration of filgrastim in all the remaining cycles.

If another episode of fever occurs despite filgrastim treatment, the doses of all the products must be decreased by 25% for all the remaining cycles. If this problem occurs in arm B before the docetaxel cycles, docetaxel must be initiated at the full dose without administration of filgrastim.

#### **In the event of liver toxicity:**

- transaminases  $> 1.5 \times ULN$  and alkaline phosphatase  $> 2.5 \times ULN$

**the docetaxel dose will be reduced to  $75 \text{ mg/m}^2$**

- total bilirubin  $> ULN$  and/or transaminase  $> 3.5 \times ULN$  + alkaline phosphatase  $> 6 \times ULN$

**docetaxel will be discontinued.**



## 6 - 6 CAUSES FOR DISCONTINUING THERAPY

- disease progression (the physician is free to propose any option that could be beneficial to the patient),
- toxicity contraindicating the continuation of the treatment plan,
- clinically evident cardiotoxicity at any time, i.e.:
  - clinically evident heart failure or coronary insufficiency
  - Echocardiography showing left ventricular hypertrophy
  - LVEF below the normal limit for the center or increased by more than 20%,
- sodium and water retention with weight gain (clinician's assessment),
- patient refusal.

## 6 - 7 CONCOMITANT TREATMENTS

- Prescriptions of non-antineoplastic agents should be noted in the case report form.
- The use of filgrastim is only acceptable in the event of febrile neutropenia or hemotoxicity impeding compliance with therapy (Section 6-4) in all the remaining cycles.
- **All postmenopausal patients with a tumor expressing hormone receptors will receive 20 mg/day of tamoxifen for five years depending on the clinician's routine practices. If the hormone receptor status is negative, hormone therapy will be left to the clinician's discretion, but the option chosen will be applied to both treatment arms and to all patients throughout the trial. Tamoxifen treatment will be instituted in the last cycle of chemotherapy.**

**The postmenopausal status will be that observed before chemotherapy is initiated.**

Corticoids are acceptable as antiemetics and as concomitant therapy before and after the docetaxel injections.

## 6 - 8 END OF ADJUVANT TREATMENT

- Radiotherapy will be initiated within four weeks following the last cycle of chemotherapy. It is mandatory in patients who have had conservative breast surgery. Irradiation of the internal mammary and supraclavicular nodes and chest wall (after mastectomy) is recommended. The choice of these indications will be retained throughout the trial for all patients in the center. External beam therapy will not be performed on the axillary nodes.
- The LVEF will be routinely measured in all patients before radiotherapy is initiated.
- Postmenopausal patients scheduled to receive tamoxifen should undergo a complete gynecological examination and pelvic ultrasonography (endovaginal if possible).

## 7 - POST-TREATMENT FOLLOW-UP

### 7 - 1 FOLLOW-UP FREQUENCY AND EXAMINATIONS

- physical examination every four months in the first two years, and then every six months for the following three years,
- annually: mammography, chest X-ray, liver ultrasound and bone scan will be performed annually for five years.

**THE FIRST COMPLETE ASSESSMENT WILL BE CARRIED OUT ONE YEAR AFTER THE INITIAL SURGERY AND THEN ANNUALLY FOR FIVE YEARS.**

### 7 - 2 MONITORING OF TOXICITY

- LVEF will be measured before the beginning of radiotherapy
- LVEF will be measured after one year and five years.

### 7 - 3 EVENTS

- Any relapse must be reported within one month after its diagnosis. The type of treatment is left to the clinician's discretion.
- An isolated elevation of CA-15.3 will not be counted as a relapse.
- Any deaths during the active treatment phase must also be rapidly reported, along with as much information on its cause as possible.

**The following will be considered as treatment failures:**

- any local relapse in the conserved breast or chest wall after mastectomy,
- any distant secondary site (confirmed if single instance),
- any specific lymph node involvement adjacent to the treated breast,
- any cancer in the contralateral breast (unless in situ),
- any death attributable to a neoplastic cause,
- any toxicity-related death.

## 8 - STATISTICAL CONSIDERATIONS

### 8 - 1 EVALUATION CRITERIA

The survival of eligible patients is calculated from the randomization date. Disease-free survival (DFS) is calculated from the randomization date to the date of recurrence.

Unexplained deaths and patients lost to follow-up will be counted as disease progression.

### 8 - 2 REQUIRED SAMPLE SIZE

To show a gain of 7.5% in five-year DFS (65% in the reference arm vs 72.5%, corresponding to a relative risk of 0.75), **1600 patients** will be needed to ensure that the power of the test is at least 90% ( $\beta = 10\%$ ), assuming a two-sided situation and accepting a significance level of 5% (see Freedman, Stat in Med 1982).

### 8 - 3 INTERIM ANALYSES

Three interim analyses are planned:

- The purpose of the first two analyses will be to study the toxicity of the FEC/docetaxel combination and make sure that it remains acceptable.

The first analysis will be carried out when the first 400 patients included in the trial have completed their adjuvant treatment, i.e. approximately nine months after the beginning of the study.

The second analysis will be performed when 800 patients have finished their therapy.

Any serious decisions concerning the trial will be submitted to a committee of independent experts.

- A third interim analysis will be done two years after the end of enrolment. This analysis will compare treatment efficacy in both regimens.

To avoid penalizing the final analysis, the superiority of one of the treatments will only be accepted if the difference in favor of one of them is significant at a 1°/oo level (Peto, BJC, 1976). Thus, the initially accepted significance level of 5% would remain practically unchanged in the final analysis.

#### **8 - 4 FINAL ANALYSIS**

- The trial will be subjected to intent-to-treat analysis five years after the date of the last inclusion.
- A secondary analysis will also be carried out on the subset of patients who did not experience toxicities justifying discontinuation of treatment during the first three cycles of FEC 100 (common to both arms).

#### **8 - 5 STATISTICAL TESTS**

The log-rank test will be used to compare the distribution of survival rates.

The Cox model will be used to fit the treatment effect, taking into account the major prognostic factors (age, tumor size, lymph node involvement, histological grade, hormone receptor status). The relative risks (group A *vs* group B) will be expressed with a confidence interval of 95%, before and after fitting.

## 9 - STUDY ORGANIZATION

### 9 -1 SPONSOR

The sponsor, in terms of the Huriet law, will be the *Fédération Nationale des Centres de Lutte Contre le Cancer* (French National Federation of Cancer Treatment Centers).

### 9 -2 REGULATORY ASPECTS

The trial will be carried out in compliance with the Declaration of Helsinki, European GCP requirements, the French law dated 20 Dec. 1988 (Appendices 1, 2, and 3), and the recommendations of the *CNIL*<sup>1</sup>.

Suitable insurance covering the risks has been taken out by the sponsor.

In compliance with the French law dated 12 Dec. 1988, this protocol was submitted to the Ethics Committee/Institutional Review Board in the district of the study coordinator (Toulouse, France).

The written approval of this protocol will be provided to each investigator listed in the appendices.

Patients included in the trial must sign the written consent form at the end of the patient information leaflet (Appendix 3).

The trial and the list of investigators will be declared to the French Medicines Agency.

### 9 -3 ORGANIZATION

A study steering committee will be in charge of supervising the trial.

It will check the validity of recorded data, the management of cases posing problems, and the veracity of the conclusions drawn from the trial. It also has the role of informing the sponsor, the EC/IRB, the co-investigators and co-sponsors on the progress of the trial and its conclusions.

The investigating centers will be represented by a responsible local physician, to whom all information must be communicated and who will collect information. The local representatives are responsible for managing patient records, for protocol compliance and for correct drug supply. The participation of a clinical research technician (CRT) is highly desirable. An implementation visit will take place when the trial is initiated at the center.

Central office: this is the responsibility of the study steering committee. It will be in charge of randomization, data collection, and practical trial management.

---

<sup>1</sup> *Commission Nationale de l'Informatique et des Libertés* - French National Data Processing and Civil Liberties Committee

## 9-4 DATA COLLECTION

Data will be recorded in a case report form specific to the trial. Detachable duplicates of each page will be forwarded to the central office as the trial progresses.

A Clinical Research Assistant (CRA) will visit each trial center at least twice a year throughout the inclusion period. The CRA along with the investigator will verify the data in the source documents. The interpretation of certain facts and toxicities will be reviewed with the Clinical Research Monitor and possibly submitted to the steering committee for arbitration.

One of the trial monitors will make three annual visits to the center during the inclusion period and then twice a year during the follow-up period (10 years).

## 9 - 5 REPORTING SERIOUS ADVERSE EVENTS

Definition of serious adverse events:

- fatal or life-threatening events (all grade 4 toxicities, or deaths)
- events that require hospitalization or prolong existing hospitalization,
- events that result in a disabling handicap,
- events that suggest a significant risk, a contraindication, or improper use,
- events that induce a congenital abnormality, cancer, or overdose.

If a serious adverse event occurs during the trial or within 30 days following the end of treatment, the investigator must report it to the randomization center by fax or telephone within 24 hours (01 45 83 93 94). The investigator must also fill in a serious adverse event report form, which is at the end of the case report form, and forward it to the sponsor within three days following notification.

The sponsor is responsible for reporting all safety information to the local regulatory authorities. The investigator must therefore rapidly report any serious adverse event to the sponsor to assure compliance with these legal obligations.

## 9 - 6 CONFIDENTIALITY

The investigator must make sure that the anonymity of the patients is protected. On all documents (including case report forms) submitted to the *FNCLCC*<sup>1</sup>, the patients must only be mentioned by an identification code and not by name or hospital number.

The investigator must keep an independent record with the patient codes and their names and addresses. The investigator must keep these documents strictly confidential.

---

<sup>1</sup> French National Federation of Cancer Centers

## **10 - PUBLICATION OF RESULTS**

Publications will be submitted on behalf of the group, and all investigators and centers will be mentioned in the appendix with the number of inclusions. Publication policy will be discussed by the Steering Committee.

The order in communications will depend on the number of evaluable patients in the study program and the role played during the trial. Centers with an ineligibility rate of more than 20% will be excluded from the study.

## **11 - ADDITIONAL STUDIES**

- COST-EFFECTIVENESS
- INVESTIGATION OF PROGNOSTIC FACTORS

The histological specimens will be stored and examined by a panel of experts. Frozen tumor specimens will be stored for a selective retrospective study. Aliquots of cytopheresis and serum will also be stored.

- QUALITY OF LIFE

## 12 - REFERENCES

- 1- **BONADONNA G., BRUSAMOLINO E., VALAGUSSA P.**  
Combination chemotherapy as an adjuvant treatment in operable breast cancer.  
Engl. J. Med., 1976; 294: 405-410.
- 2- **FISHER B., SLACK N., KATRICH D., et al.**  
Ten year follow-up results of patients with carcinoma of the breast in a cooperative clinical trial evaluating surgical adjuvant chemotherapy.  
Surg. Gynecol. Obstr., 1975 ; 140 : 528 - 534.
- 3- **TANCINI G., BONADONNA G., VALAGUSSA P., et al.**  
Adjuvant CMF in breast cancer : comparative 5-year results of 12 versus 6 cycles.  
J. Clin. Oncol., 1983 ; 1 : 2 - 10.
- 4- **FALKSON H., GRAY R., WOLBERG W., et al.**  
Adjuvant trial of 12 cycles of CMFPT followed by observation or continuous Tamoxifen versus four cycles of CMFPT in post menopausal women with breast cancer : an Eastern Cooperative Oncology Group phase III study.  
J. Clin. Oncol., 1990 ; 8 : 599 - 607.
- 5- **VELEZ-GARCIA E., MOORE M., VOGEL C., et al**  
Postmastectomy adjuvant chemotherapy with or without radiation therapy in women with operable breast cancer and positive axillary lymph node. The Southeastern Cancer Study Group experience.  
Breast Cancer Res. Treat., 1983 ; 3 (Suppl 1) : 49 - 60.
- 6- **HENDERSON I., GELMAN R., HARRIS J., et al.**  
Duration of therapy in adjuvant chemotherapy trials.  
NCI Monogr., 1986; 1: 95-98.
- 7- **GOLDHIRSH A., GELBER R.**  
Adjuvant treatments for early breast cancer  
NCI Monogr., 1986:1:55-70.
- 8- **EARLY BREAST CANCER TRIALIST COLLABORATIVE GROUP.**  
Systemic treatment of early breast cancer by hormonal, cytotoxic or immune therapy.  
Lancet, 1992, 339 : 1-15,71-85
- 9- **FISHER B., REDMOND C., WICKERHAM D., et al.**  
Doxorubicin-containing regimens for the treatment of stage II breast cancer : the NSABP experience.  
J. Clin. Oncol., 1989 ; 8 : 572 - 582.



**10- FISHER B., BROWN A., DIMITROV N., et al.**

Two months of doxorubicin-cyclophosphamide with or without reinduction therapy compared with 6 months of cyclophosphamide, methotrexate and fluorouracil in positive-node breast cancer patients with tamoxifen nonresponsive tumors.  
J. Clin. Oncol., 1990 ; 8 : 1483 - 1496.

**11- MISSET J.L., GIL DELGADO M., CHOLLET Ph., et al**

Ten years results of the French adjuvant trial comparing AVCF to CMF.  
7th International Conference on the adjuvant therapy, Tucson, 1993, Abst. 29

**12- BONADONNA G., ZAMBETTI M., VALAGUSSA P., et al .**

Sequential or alternating doxorubicin and CMF regimen in breast cancer with more than three positive nodes ;  
JAMA, 1995 ; 273 : 542 - 547.

**13- BEUZEBOC P., MOSSERI V., DORVAL T., et al.**

Adriamycin based combination chemotherapy significantly improves survival in high risk premenopausal breast cancer patients.  
Proc. 4th Conference on Adjuvant Therapy of Primary Breast Cancer St Gallen ; 1992:72.

**14- COOMBES R., BLISS J., WILLS J., et al**

Adjuvant cyclophosphamide, methotrexate and fluorouracil versus fluorouracil, epirubicin and cyclophosphamide in premenopausal women with axillary node-positive operable breast cancer : results of a randomized trial.  
J. Clin. Oncol., 1996 ; 14 : 35 -45.

**15- MOLITERNIA., BONADONNA G., VALAGUSSA P., et al.**

Cyclophosphamide, methotrexate and fluorouracil with or without doxorubicin in the adjuvant treatment of resectable breast cancer with one to three positive nodes.  
J. Clin. Oncol., 1991 ; 9:1124 -1130

**16- CARPENTER J., VELEZ-GARCIA E., ARON B., et al.**

Five year results of a randomized comparison of cyclophosphamide, doxorubicin and fluorouracil (CAF) vs cyclophosphamide, methotrexate and fluorouracil (CMF) for node positive breast cancer : a Southeastern Cancer Study Group.  
Proc. Am. Soc.. Clin. Oncol., 1994 ; 13 : 66.

**17- Mc GUIRE W., ROWINSKI E.**

Paclitaxel in cancer treatment  
Maral Dekker, 1995

**18- Chemotherapy with Paclitaxel and Platinum compounds**

Sem. in Oncol., 1995 ; 22 : 5

**19- WILSON H., BERG S., BRYANT G., et al.**

Paclitaxel in Doxorubicin-refractory or Mitoxantrone-refractory breast cancer: a phase I/II trial of 96-hour infusion  
J. Clin. Oncol., 1994 ; 12 : 1621- 1629

**20- HORTOBAGYI G.**

Innovative approaches to breast cancer treatment : the role of Paclitaxel  
Sem. in Oncol, 1995 ; 22 : 4

**21- GIANNI L., MUNZONE E., CAPRI G., et al.**

Paclitaxel by 3-hours infusion in combination with bolus Doxorubicin in women with untreated metastatic breast cancer : high antitumor efficacy and cardiac effects in a dose-finding and sequence-finding study  
J. Clin. Oncol., 1995 ; 13 : 2688 - 2699

**22- Investigator's brochure of Docetaxel**

Rhone-Poulenc Rorer Limited, June 1993 and updated on November 1994

**23- FUMOLEAU P., DELCROIX V., PERROCHEAU G., et al.**

Docetaxel in combination with Vinorelbine as first line chemotherapy in patients with metastatic breast cancer : preliminary results on 22 entered patients.  
San Antonio Symposium, 1995 ; A314, 91

**24- DIERAS V., GRUIA G., POUILLART P., et al.**

A phase I study of the combination of Docetaxel and Doxorubicin in first line chemotherapy treatment of metastatic breast cancer : preliminary results.  
San Antonio Symposium, 1995 , A 313, 91

**25- FRENCH EPIRUBICIN STUDY GROUP**

A prospective randomized phase III trial comparing combination chemotherapy with Cyclophosphamide, Fluorouracil , and either Doxorubicin or Epirubicin.  
J. Clin. Oncol, 1988, 6 : 679-688

**26- ITALIAN MULTICENTRE BREAST STUDY WITH EPIRUBICIN**

Phase III randomized study of fluorouracil, epirubicin and cyclophosphamide vs fluorouracil, doxorubicin and cyclophosphamide in advanced breast cancer an Italian multicentre trial.  
J. Clin. Oncol, 1988 ; 6 : 976 -982

**27- FRENCH EPIRUBICIN STUDY GROUP**

A prospective randomized trial comparing Epirubicin single-agent chemotherapy to two Fluorouracil, Cyclophosphamide, and epirubicin regimens differing in Epirubicin dose in advanced breast cancer patients.  
J.Clin.Oncol. ,1991, 9 : 305-313

**28- P. BASTIT, B. CHEVALLIER, H. ROCHE et al.**

Epirubicin dose and schedule dependency in 3 FEC first line regimens in metastatic breast cancer. Early report

Am. Soc. Clin. Oncol., 1994, abst. 71

**29- A. BREMONT, P. KERBRAT, P. FUMOLEAU et al.**

Five year follow-up results of a randomized trial testing the role of the dose-intensity and duration of chemotherapy in node-positive pre-menopausal breast cancer patients.

Am. Soc. Clin. Oncol., 1996, abst.119

**30- J. BONNETERRE, H. ROCHE, A. BREMOND et al.**

A randomized trial of adjuvant chemotherapy with FEC 50 vs FEC 100 for node positive operable breast cancer. Early report.

Am. Soc. Clin. Oncol., 1996, abst. 82

## **13 - APPENDICES**

**13-1 LEGAL ENVIRONMENT (HURIET LAW, HELSINKI DECLARATION)**

**13-2 INSURANCE CERTIFICATE**

**13-3 ETHICS COMMITTEE / INVESTIGATIONAL REVIEW BOARD  
APPROVAL**

**13-4 PATIENT INFORMATION AND INFORMED CONSENT FORM**

**13-5 SERIOUS ADVERSE EVENT REPORT FORM**

**13-6 WHO INDEX FOR PERFORMANCE STATUS**

**13-7 WHO TOXICITY CRITERIA**

**13-8 PATHOLOGIC ANATOMY - TECHNICAL RECOMMENDATIONS**

## **13-1 LEGAL ENVIRONMENT**

- **HURIET LAW**
- **HELSINKI DECLARATION**

- **HURIET LAW** No. 88-1138 dated 20 December 1988 :

Official French legal and regulatory provisions regarding the protection of persons involved in biomedical research (see full French text of the law on the following pages).

# LOI HURIET

## LOIS

**LOI n° 88-1138 du 20 décembre 1988 relative à la protection des personnes qui se prêtent à des recherches biomédicales (1)**

NOR : SPSX8810045L

L'Assemblée nationale et le Sénat ont adopté,

Le Président de la République promulgue la loi dont le teneur suit :

Art. 1<sup>er</sup>. - Il est inséré, après le livre II du code de la santé publique relatif à la protection sanitaire de la famille et de l'enfance, un livre II *bis* ainsi rédigé :

### « LIVRE II *bis*

#### « Protection des personnes qui se prêtent à des recherches biomédicales

« Art. L. 209-1. - Les essais, études ou expérimentations organisés et pratiqués sur l'être humain en vue du développement des connaissances biologiques ou médicales sont autorisés dans les conditions prévues au présent livre et sont désignés ci-après par les termes : "recherche biomédicale".

« Les recherches biomédicales dont on attend un bénéfice thérapeutique direct pour la personne qui s'y prête sont des recherches à finalité thérapeutique directe. Toutes les autres recherches, qu'elles portent sur des personnes malades ou non, sont sans finalité thérapeutique directe.

« La personne physique ou morale qui prend l'initiative d'une recherche biomédicale sur l'être humain est dénommée ci-après le promoteur. La ou les personnes physiques qui dirigent et surveillent la réalisation de la recherche sont dénommées ci-après les investigateurs.

« Lorsque le promoteur d'une recherche confie sa réalisation à plusieurs investigateurs, il désigne parmi eux un investigateur coordonnateur.

### « TITRE I<sup>er</sup>

#### « Dispositions générales

« Art. L. 209-2. - Aucune recherche biomédicale ne peut être effectuée sur l'être humain :

« - si elle ne se fonde pas sur le dernier état des connaissances scientifiques et sur une expérimentation préclinique suffisante ;

« - si le risque prévisible encouru par les personnes qui se prêtent à la recherche est hors de proportion avec le bénéfice escompté pour ces personnes ou l'intérêt de cette recherche ;

« - si elle ne vise pas à étendre la connaissance scientifique de l'être humain et les moyens susceptibles d'améliorer sa condition.

« Art. L. 209-3. - Les recherches biomédicales ne peuvent être effectuées que :

« - sous la direction et sous la surveillance d'un médecin justifiant d'une expérience appropriée ;

« - dans des conditions matérielles et techniques adaptées à l'essai et compatibles avec les impératifs de rigueur scientifique et de sécurité des personnes qui se prêtent à ces recherches

« Art. L. 209-4. - Les recherches sans finalité thérapeutique directe sur les femmes enceintes ou qui allaitent ne sont admises que si elles ne présentent aucun risque prévisible pour la santé de la femme ou de l'enfant et si elles sont utiles à la connaissance des phénomènes liés à la grossesse ou à l'allaitement.

« Art. L. 209-5. - Les personnes privées de liberté par une décision judiciaire ou administrative ne peuvent être sollicitées pour se prêter à des recherches biomédicales que s'il en est attendu un bénéfice direct et majeur pour leur santé.

« Art. L. 209-6. - Les mineurs, les majeurs sous tutelle, les personnes séjournant dans un établissement sanitaire ou social et les malades en situation d'urgence ne peuvent être sollicités pour une recherche biomédicale que si l'on peut en attendre un bénéfice direct pour leur santé.

« Toutefois, les recherches sans finalité thérapeutique directe sont admises si les trois conditions suivantes sont remplies :

« - ne présenter aucun risque sérieux prévisible pour leur santé ;

« - être utiles à des personnes présentant les mêmes caractéristiques d'âge, de maladie ou de handicap ;

« - ne pouvoir être réalisées autrement.

« Art. L. 209-7. - Pour les recherches biomédicales sans finalité thérapeutique directe, le promoteur assume, même sans faute, l'indemnisation intégrale des conséquences dommageables de la recherche pour la personne qui s'y prête, sans toutefois que puisse être opposé le fait d'un tiers ou le retrait volontaire de la personne qui avait initialement consenti à se prêter à la recherche.

« Pour les recherches biomédicales à finalité thérapeutique directe, le promoteur assume l'indemnisation des conséquences dommageables de la recherche pour la personne qui s'y prête, sauf preuve à sa charge que le dommage n'est pas imputable à sa faute, sans toutefois que puisse être opposé le fait d'un tiers ou le retrait volontaire de la personne qui avait initialement consenti à se prêter à la recherche.

« Pour toute recherche biomédicale, le promoteur souscrit une assurance garantissant sa responsabilité civile telle qu'elle résulte du présent article et celle de tout intervenant, indépendamment de la nature des liens existant entre les intervenants et le promoteur. Les dispositions du présent article sont d'ordre public.

« Art. L. 209-8. - La recherche biomédicale ne donne lieu à aucune contrepartie financière hormis le remboursement des frais exposés et sous réserve de dispositions particulières prévues par l'article L. 209-15 du présent code relatif aux recherches sans finalité thérapeutique directe.

## « TITRE II

### « Du consentement

« Art. L. 209-9. - Préalablement à la réalisation d'une recherche biomédicale sur une personne, le consentement libre, éclairé et exprès de celle-ci doit être recueilli après que l'investigateur, ou un médecin qui le représente, lui a fait connaître :

« - l'objectif de la recherche, sa méthodologie et sa durée ;

« - les contraintes et les risques prévisibles, y compris en cas d'arrêt de la recherche avant son terme ;

« - l'avis du comité mentionné à l'article L. 209-12 du présent code.

« Il informe la personne dont le consentement est sollicité de son droit de refuser de participer à une recherche ou de retirer son consentement à tout moment sans encourir aucune responsabilité.

« A titre exceptionnel, lorsque dans l'intérêt d'une personne malade le diagnostic de sa maladie n'a pu lui être révélé, l'investigateur peut, dans le respect de sa confiance, réserver certaines informations liées à ce diagnostic. Dans ce cas, le protocole de la recherche doit mentionner cette éventualité.

« Les informations communiquées sont résumées dans un document écrit remis à la personne dont le consentement est sollicité.

« Le consentement est donné par écrit ou, en cas d'impossibilité, attesté par un tiers. Ce dernier doit être totalement indépendant de l'investigateur et du promoteur.

« Toutefois, en cas de recherches biomédicales à mettre en œuvre dans des situations d'urgence qui ne permettent pas de recueillir le consentement préalable de la personne qui y sera soumise, le protocole présenté à l'avis du comité instauré par l'article L. 209-11 du présent code peut prévoir

que le consentement de cette personne ne sera pas recherché et que seul sera sollicité celui de ses proches s'ils sont présents, dans les conditions prévues ci-dessus. L'intéressé sera informé dès que possible et son consentement lui sera demandé pour la poursuite éventuelle de cette recherche.

« Art. L. 209-10. - Lorsqu'une recherche biomédicale est effectuée sur des mineurs ou des majeurs sous tutelle :

« - le consentement doit être donné, selon les règles prévues à l'article L. 209-9 du présent code, par les titulaires de l'exercice de l'autorité parentale pour les mineurs non émancipés. Pour les mineurs ou les majeurs sous tutelle, le consentement est donné par le tuteur pour les recherches à finalité thérapeutique directe ne présentant pas un risque prévisible sérieux et, dans les autres cas, par le tuteur autorisé par le conseil de famille ou le juge des tutelles ;

« - le consentement du mineur ou du majeur sous tutelle doit également être recherché lorsqu'il est apte à exprimer sa volonté. Il ne peut être passé outre à son refus ou à la révocation de son consentement.

## « TITRE III

### « Dispositions administratives

« Art. L. 209-11. - Dans chaque région, le ministre chargé de la santé agréé un ou, selon les besoins, plusieurs comités consultatifs de protection des personnes dans la recherche biomédicale.

« Le ministre fixe par arrêté le nombre de comités dans chaque région.

« Les comités sont compétents au sein de la région où ils ont leur siège. Ils exercent leur mission en toute indépendance. Ils doivent être dotés de la personnalité juridique.

« Les comités sont composés de manière à assurer une diversité des compétences dans le domaine biomédical et à l'égard des questions éthiques, sociales, psychologiques et juridiques.

« Leurs membres sont nommés par le représentant de l'Etat dans la région, par tirage au sort des candidats.

« Les membres des comités, les personnes appelées à collaborer à leurs travaux et les agents de l'Etat qui en sont dépositaires sont tenus, dans les conditions et sous les peines prévues à l'article 378 du code pénal, de garder secrètes les informations dont ils peuvent avoir connaissance à raison de leurs fonctions et qui sont relatives à la nature des recherches, aux personnes qui les organisent ou qui s'y prêtent ou aux produits, objets ou méthodes expérimentés.

« Ne peuvent valablement participer à une délibération les personnes qui ne sont pas indépendantes du promoteur et de l'investigateur de la recherche examinée.

« Le ministre de la santé peut retirer l'agrément si les conditions d'indépendance, de composition et de fonctionnement nécessaires pour assurer leur mission dans les meilleures conditions ne sont plus satisfaites.

« Art. L. 209-12. - Avant de réaliser une recherche sur l'être humain, tout investigateur est tenu d'en soumettre le projet à l'avis d'un comité consultatif de protection des personnes dans la recherche biomédicale ayant son siège dans la région où il exerce son activité.

« Dans le cas d'une recherche confiée à plusieurs investigateurs, l'avis prévu à l'alinéa précédent est demandé par l'investigateur coordonnateur, qui soumet le projet à un comité siégeant dans la région où il exerce son activité.

« Le comité rend son avis sur les conditions de validité de la recherche, notamment la protection des participants, leur information et les modalités de recueil de leur consentement, les indemnités éventuellement dues, la pertinence générale du projet et l'adéquation entre les objectifs poursuivis et les moyens mis en œuvre ainsi que la qualification du ou des investigateurs. Il communique au ministre chargé de la santé tout avis défavorable donné à un projet de recherche.

« Avant sa mise en œuvre, le promoteur transmet au ministre chargé de la santé une lettre d'intention décrivant les données essentielles de la recherche, accompagnée de



l'avis du comité consulté. Cet avis ne le dégage pas de sa responsabilité. Les projets ayant fait l'objet d'un avis défavorable ne peuvent être mis en œuvre avant un délai de deux mois à compter de leur réception par le ministre.

« Le ministre peut, à tout moment, en cas de risque pour la santé publique ou de non-respect des dispositions du présent livre, suspendre ou interdire une recherche biomédicale.

« Art. L. 209-13. - Les médecins inspecteurs de la santé et les pharmaciens inspecteurs de la santé ont qualité pour veiller au respect des dispositions du présent livre et des textes réglementaires pris pour son application.

#### « TITRE IV

##### « Dispositions particulières aux recherches sans finalité thérapeutique directe

« Art. L. 209-14. - Les recherches biomédicales sans finalité thérapeutique directe ne doivent comporter aucun risque prévisible sérieux pour la santé des personnes qui s'y prêtent.

« Elles doivent être précédées d'un examen médical des personnes concernées. Les résultats de cet examen leur sont communiqués par l'intermédiaire du médecin de leur choix.

« Art. L. 209-15. - Dans le cas d'une recherche sans finalité thérapeutique directe à l'égard des personnes qui s'y prêtent, le promoteur verse à ces personnes une indemnité en compensation des contraintes subies. Le montant total des indemnités qu'une personne peut percevoir au cours d'une même année est limité à un maximum fixé par le ministre chargé de la santé.

« Les recherches effectuées sur des mineurs, des majeurs sous tutelle ou des personnes séjournant dans un établissement sanitaire ou social ne peuvent en aucun cas donner lieu à une telle indemnité.

« Art. L. 209-16. - Toute recherche biomédicale sans finalité thérapeutique directe sur une personne qui n'est pas affiliée à un régime de sécurité sociale est interdite.

« L'organisme de sécurité sociale dispose contre le promoteur d'une action en paiement des prestations versées ou fournies.

« Art. L. 209-17. - Nul ne peut se prêter simultanément à plusieurs recherches biomédicales sans finalité thérapeutique directe.

« Pour chaque recherche sans finalité thérapeutique directe, le protocole soumis à l'avis consultatif du comité consultatif de protection des personnes dans la recherche biomédicale détermine une période d'exclusion au cours de laquelle la personne qui s'y prête ne peut participer à une autre recherche sans finalité thérapeutique directe. La durée de cette période varie en fonction de la nature de la recherche.

« En vue de l'application des dispositions ci-dessus, le ministre chargé de la santé établit et gère un fichier national.

« Art. L. 209-18. - Les recherches biomédicales sans finalité thérapeutique directe ne peuvent être réalisées que dans un lieu équipé des moyens matériels et techniques adaptés à la recherche et compatibles avec les impératifs de sécurité des personnes qui s'y prêtent, autorisé, à ce titre, par le ministre chargé de la santé.

#### « TITRE V

##### « Sanctions pénales

« Art. L. 209-19. - Est puni d'une peine d'emprisonnement de six mois à trois ans et d'une amende de 12 000 F à 200 000 F ou de l'une de ces deux peines seulement quiconque aura pratiqué ou fait pratiquer sur l'être humain une recherche biomédicale sans avoir recueilli le consentement prévu par les articles L. 209-9 et L. 209-10 du présent code, ou alors qu'il aura été retiré.

« Est punie des peines prévues à l'alinéa précédent toute personne qui aura pratiqué ou fait pratiquer une recherche biomédicale en infraction aux dispositions des articles L. 209-4 à L. 209-6 et du dernier alinéa de l'article L. 209-9.

« Art. L. 209-20. - Est puni d'un emprisonnement de deux mois à un an et d'une amende de 6 000 F à 100 000 F ou de l'une de ces deux peines seulement :

« - quiconque aura pratiqué ou fait pratiquer une recherche biomédicale sans avoir obtenu l'avis préalable prévu par l'article L. 209-12 du présent code ;

« - quiconque aura pratiqué ou fait pratiquer une recherche biomédicale dans des conditions contraires aux dispositions des deux premiers alinéas de l'article L. 209-17 du présent code ;

« - quiconque aura pratiqué ou fait pratiquer, continué de pratiquer ou de faire pratiquer une recherche biomédicale dont la réalisation a été interdite ou suspendue par le ministre chargé de la santé.

« L'investigateur qui réalise une telle recherche en infraction aux dispositions de l'article L. 209-18 est puni des mêmes peines.

« Art. L. 209-21. - Le promoteur dont la responsabilité civile n'est pas garantie par l'assurance prévue à l'article L. 209-7 du présent code est puni d'un emprisonnement de un à six mois et d'une amende de 6 000 F à 100 000 F ou de l'une de ces deux peines seulement.

Art. 2. - Après le 14° bis de l'article 81 du code général des impôts, il est inséré un 14° ter ainsi rédigé :

« 14° ter L'indemnité prévue par l'article L. 209-15 du code de la santé publique : ».

Art. 3. - La première phrase du premier alinéa de l'article L. 564 du code de la santé publique est ainsi rédigée :

« Dans tous les établissements qu'ils sont chargés d'inspecter, les pharmaciens inspecteurs de la santé ont qualité pour rechercher et constater les infractions aux dispositions du présent livre, aux dispositions du livre II bis, en application de l'article L. 209-13 dudit livre, aux lois sur la répression des fraudes et plus généralement à toutes les lois qui concernent l'exercice de la pharmacie et aux textes réglementaires pris pour leur application. »

Art. 4. - Le septième alinéa (6°) de l'article L. 605 du code de la santé publique est ainsi rédigé :

« 6° Les règles applicables à l'expérimentation des médicaments en vue de leur autorisation de mise sur le marché ainsi qu'aux essais organisés après la délivrance de cette autorisation : ».

Art. 5. - Après l'article L. 577 bis du code de la santé publique, il est inséré un article L. 577 ter ainsi rédigé :

« Art. L. 577 ter. - Dans les établissements sanitaires ou sociaux, publics ou privés qui sont titulaires d'une licence d'exercice de pharmacie, en application de l'article L. 577 du présent code, le pharmacien assurant la gérance de cette pharmacie doit être préalablement informé par le promoteur des essais, études ou expérimentations envisagés sur des produits, substances ou médicaments.

« Ces produits, substances ou médicaments sont détenus et dispensés par le ou les pharmaciens de l'établissement. »

Art. 6. - Des décrets en Conseil d'Etat fixent les modalités d'application de la présente loi et notamment :

1° La composition et les conditions d'agrément, de financement, de fonctionnement et de nomination des membres des comités consultatifs de protection des personnes dans la recherche biomédicale ainsi que la nature des informations qui doivent leur être communiquées par l'investigateur et sur lesquelles ils sont appelés à émettre leur avis ;

2° Les conditions de la constitution, de la gestion et de la consultation du fichier national prévu à l'article L. 209-17 du code de la santé publique ;

3° Les conditions de l'autorisation prévue à l'article L. 209-18 du même code ;

4° La nature des informations qui doivent être communiquées par le promoteur au ministre chargé de la santé, dans la lettre d'intention mentionnée à l'article L. 209-12 du code de la santé publique.

Les articles L. 209-11, L. 209-12, L. 209-17, L. 209-18 et L. 209-20 (premier à troisième et dernier alinéas) du code de la santé publique entreront en vigueur aux dates fixées par les textes pris pour leur application et au plus tard le 1<sup>er</sup> janvier 1990.

La présente loi sera exécutée comme loi de l'Etat.

Fait à Paris, le 20 décembre 1988.

FRANÇOIS MITTERRAND

Par le Président de la République :

*Le Premier ministre,*

MICHEL ROCARD

*Le garde des sceaux, ministre de la justice,*

PIERRE ARPAILLANGE

*Le ministre de la solidarité, de la santé  
et de la protection sociale,*

*porte-parole du Gouvernement,*

CLAUDE ÉVIN

*Le ministre de la recherche et de la technologie,*

HUBERT CURIEN

(1) Travaux préparatoires : loi n° 88-1138.

*Sénat :*

Proposition de loi n° 286 rectifiée bis (1987-1988) ;

Rapport de M. Claude Huriet, au nom de la commission des affaires sociales, n° 19 (1988-1989) ;

Discussion et adoption le 12 octobre 1988.

*Assemblée nationale :*

Proposition de loi, adoptée par le Sénat, n° 293 ;

Rapport de M. Bernard Charles, au nom de la commission des affaires culturelles, n° 356 ;

Discussion les 23 novembre et 12 décembre 1988 ;

Adoption le 12 décembre 1988.

*Sénat :*

Projet de loi, adopté par l'Assemblée nationale, n° 131 (1988-1989) ;

Rapport de M. Claude Huriet, au nom de la commission des affaires sociales, n° 132 (1988-1989) ;

Discussion et adoption le 13 décembre 1988.

| POIDS                 | TARIFS<br>(en francs) |
|-----------------------|-----------------------|
| 250 - 500 g .....     | 8,40                  |
| 500 - 1 000 g .....   | 14,00                 |
| 1 000 - 2 000 g ..... | 19,70                 |
| 2 000 - 3 000 g ..... | 26,50                 |
| 3 000 - 4 000 g ..... | 31,50                 |
| 4 000 - 5 000 g ..... | 36,50                 |

Art. 10. - Lorsque le traitement des envois postaux de presse nécessite des prestations réciproques spécifiques relatives à l'acheminement ou la distribution des journaux, dont la réalisation est conclue par convention entre la Poste et les expéditeurs, le ministre des postes, des télécommunications et de l'espace est autorisé à fixer, conformément aux modalités prévues à l'article D. 41-1 du code des postes et télécommunications, les principes de la tarification correspondance.

Art. 11. - Le décret n° 89-706 du 28 septembre 1989 portant réaménagement des taxes applicables aux journaux et écrits périodiques (régime intérieur et régime international) est abrogé.

Art. 12. - Les dispositions du présent décret prennent effet à compter du 1<sup>er</sup> octobre 1990.

Art. 13. - Le ministre d'Etat, ministre de l'économie, des finances et du budget, le ministre des postes, des télécommunications et de l'espace et le ministre délégué auprès du ministre d'Etat, ministre de l'économie, des finances et du budget, chargé du budget, sont chargés, chacun en ce qui le concerne, de l'exécution du présent décret, qui sera publié au *Journal officiel* de la République française.

Fait à Paris, le 28 septembre 1990.

MICHEL ROCARD

Par le Premier ministre :

*Le ministre des postes,  
des télécommunications et de l'espace,*  
PAUL QUILÈS

*Le ministre d'Etat, ministre de l'économie,  
des finances et du budget,*  
PIERRE BÉRÉGOVOY

*Le ministre délégué auprès du ministre d'Etat,  
ministre de l'économie, des finances et du budget,  
chargé du budget,*  
MICHEL CHARASSE

## MINISTÈRE DE LA SOLIDARITÉ, DE LA SANTÉ ET DE LA PROTECTION SOCIALE

Décret n° 90-872 du 27 septembre 1990 portant application de la loi n° 88-1138 du 20 décembre 1988 modifiée relative à la protection des personnes qui se prêtent à des recherches biomédicales et modifiant le code de la santé publique (deuxième partie) : Décrets en Conseil d'Etat)

NOR : SPSM9001613D

Le Premier ministre,

Sur le rapport du ministre d'Etat, ministre de l'économie, des finances et du budget, et du ministre de la solidarité, de la santé et de la protection sociale,

Vu le code de la santé publique, et notamment ses livres II bis et V ;

Vu l'ordonnance n° 59-2 du 2 janvier 1959 portant loi organique relative aux lois de finances, et notamment son article 19 ;

Vu la loi n° 67-1176 du 29 décembre 1967 relative à la régulation des naissances et abrogeant les articles L. 648 et L. 649 du code de la santé publique ;

Vu la loi n° 78-17 du 6 janvier 1978 relative à l'informatique, aux fichiers et aux libertés ;

Vu la loi n° 85-772 du 25 janvier 1985 portant diverses mesures d'ordre social, et notamment son article 44 ;

Vu la loi n° 88-1138 du 20 décembre 1988 modifiée relative à la protection des personnes qui se prêtent à des recherches biomédicales ;

Vu le décret n° 69-104 du 3 février 1969 portant règlement d'administration publique pour l'application des articles 2, 3 et 5 de la loi n° 67-1176 du 28 décembre 1967 ;

Vu le décret n° 81-514 du 12 mai 1981 relatif à l'organisation de la protection des secrets et des informations concernant la défense nationale et la sûreté de l'Etat ;

Vu l'avis de la Commission nationale de l'informatique et des libertés en date du 2 juillet 1990 ;

Le Conseil d'Etat (commission spéciale) entendu,

Décète :

Art. 1<sup>er</sup>. - Il est créé dans la deuxième partie (partie Réglementaire) du code de la santé publique un livre II bis intitulé :

« LIVRE II bis

« Protection des personnes qui se prêtent à des recherches biomédicales »

Art. 2. - Ce livre est ainsi rédigé :

« TITRE I<sup>er</sup>

« Comités consultatifs de protection des personnes dans la recherche biomédicale

« Chapitre I<sup>er</sup>

« Constitution

« Article R. 2001

« Les comités consultatifs de protection des personnes dans la recherche biomédicale comprennent douze membres titulaires :

« 1. Quatre personnes, dont au moins trois médecins, ayant une qualification et une expérience approfondie en matière de recherche biomédicale ;

« 2. Un médecin généraliste ;

« 3. Deux pharmaciens dont l'un au moins exerce dans un établissement de soins ;

« 4. Une infirmière ou un infirmier au sens des articles L. 473 à L. 477 du code de la santé publique ;

« 5. Une personne qualifiée en raison de sa compétence à l'égard des questions d'éthique ;

« 6. Une personne qualifiée en raison de son activité dans le domaine social ;

« 7. Une personne autorisée à faire usage du titre de psychologue ;

« 8. Une personne qualifiée en raison de sa compétence en matière juridique.

« Les comités comprennent en outre douze membres suppléants satisfaisant aux mêmes conditions.

« Article R. 2002

« Chaque comité a son siège au sein de la direction régionale des affaires sanitaires et sociales ou d'une direction départementale des affaires sanitaires et sociales. La direction régionale peut passer convention avec un établissement hospitalier public aux fins de donner aux comités les moyens en locaux, matériels, et éventuellement en secrétariat, nécessaires pour assurer leur mission moyennant une rémunération forfaitaire versée par le comité intéressé.

« Article R. 2003

« Le préfet de région établit, pour chacune des catégories énumérées à l'article R. 2001, la liste des personnes susceptibles d'être tirées au sort pour siéger dans un comité déterminé.

« Cette liste comprend au maximum :

« 1. Pour les médecins ou personnes qualifiés en matière de recherche biomédicale : quarante personnes, dont les trois arts au moins sont médecins, parmi lesquelles :

« a) Quinze personnes au plus, dont au moins les trois arts sont des médecins, présentés par les directeurs d'unités de formation et de recherche médicales de la région ;

« b) Quinze personnes au plus, dont au moins les trois arts sont des médecins, présentés par le directeur général de l'institut national de la santé et de la recherche médicale ou représentant dans la région ;

« c) Dix personnes au plus, dont au moins les trois quarts sont des médecins, présentés par le préfet de région après consultation des principaux établissements de soins et des autres établissements ou organismes compétents en matière de formation ou de recherche biomédicale dans la région ;

« 2. Pour les médecins généralistes :

« a) Quatre médecins présentés par le président du conseil national de l'Ordre national des médecins après consultation des présidents des conseils départementaux de l'ordre dans la région ;

« b) Trois médecins enseignants ou maîtres de stage présentés par le ou les recteurs d'académie ;

« c) Trois médecins présentés par l'union régionale des associations de formation médicale continue ;

« 3. Pour les pharmaciens, vingt personnes, à savoir :

« a) Quatorze pharmaciens exerçant dans des établissements de soins, de formation ou de recherche biomédicale, présentés par le préfet de région après consultation des principaux établissements de cette nature dans la région ;

« b) Trois pharmaciens titulaires d'officine présentés par le président du conseil régional de l'Ordre national des pharmaciens ;

« c) Trois pharmaciens-assistants d'officine présentés par le président du conseil central de la section D de l'Ordre national des pharmaciens ;

« 4. Pour les infirmières ou infirmiers :

« Dix infirmières ou infirmiers, dont neuf exerçant dans des établissements de soins et un exerçant à titre libéral, présentés par le préfet de région ;

« 5. Pour les personnes qualifiées en matière d'éthique :

« a) Six personnes enseignant dans le domaine des sciences humaines dans l'enseignement supérieur ou secondaire présentées par le ou les recteurs d'académie ;

« b) Quatre personnes présentées par le préfet de région après consultation des représentants des principaux courants de pensée ;

« 6. Pour les personnes qualifiées dans le domaine social :

« a) Deux personnes présentées par l'union régionale des associations de consommateurs ;

« b) Deux personnes présentées par l'union régionale des associations familiales ;

« c) Deux personnes présentées par le président du comité national des retraités et des personnes âgées ou, à défaut, par le préfet de région après consultation des principales associations de personnes âgées dans la région ;

« d) Deux personnes présentées par le préfet de région après consultation des principales associations de malades ou de personnes handicapées présentes dans la région ;

« e) Deux assistants ou assistants de service social présentés par le préfet de région ;

« 7. Pour les personnes autorisées à faire usage du titre de psychologue :

« Dix personnes présentées par le préfet de région ;

« 8. Pour les personnes qualifiées en matière juridique :

« a) Deux magistrats présentés par le premier président de la cour d'appel dans le ressort de laquelle siège le comité ;

« b) Deux magistrats présentés par le président du tribunal de grande instance dans le ressort duquel siège le comité ;

« c) Trois avocats présentés par le bâtonnier du barreau près le tribunal de grande instance dans le ressort duquel siège le comité ;

« d) Deux personnes enseignant le droit, présentées par le ou les présidents de la ou des universités de la région.

« Article R. 2004

Le préfet de région fait procéder, dans chaque catégorie, au tirage au sort du nombre de membres titulaires prévu à l'article R. 2001 puis, dans les mêmes conditions, d'un nombre de membres suppléants.

« Ce tirage au sort est public et fait l'objet d'une publicité préalable.

« Nul ne peut faire l'objet d'un tirage au sort s'il est déjà membre d'un comité consultatif de protection des personnes dans la recherche biomédicale.

« Il ne peut être procédé au tirage au sort d'une catégorie de membres si le nombre de personnes pouvant être tirées au sort n'est pas au moins le double du nombre des membres titulaires et suppléants prévu à l'article R. 2001 pour cette catégorie.

« Article R. 2005

« Les personnes tirées au sort sont nommées par le préfet de région. Ces nominations sont publiées au *Journal officiel* de la République française.

« Le mandat des membres des comités est de six ans. Toutefois, lors de la création d'un nouveau comité, le premier mandat des membres faisant l'objet du premier renouvellement mentionné à l'article R. 2006 est de trois ans.

« Article R. 2006

« Les comités sont renouvelés par moitié tous les trois ans.

« Le premier renouvellement porte sur la moitié des membres des catégories 1 et 3, désignés par tirage au sort, ainsi que sur les membres des catégories 2, 7 et 8 mentionnées à l'article R. 2001. Le renouvellement suivant porte sur les autres membres des catégories 1 et 3 ainsi que sur les membres des catégories 4, 5 et 6.

« Article R. 2007

« En cas de vacance survenant en cours de mandat, le siège d'un membre titulaire est pourvu par le premier suppléant ayant été tiré au sort dans la même catégorie.

« Le siège d'un membre suppléant devenu vacant au cours des cinq premières années du mandat doit être pourvu par tirage au sort dans les conditions prévues aux articles R. 2003 et R. 2004. Les mandats des personnes ainsi nommées prennent fin à la même date que ceux des membres remplacés.

« Article R. 2008

« Les membres titulaires et les membres suppléants élisent, parmi les membres titulaires, le président du comité à la majorité absolue des présents. Si cette majorité n'a pu être atteinte à l'issue de trois tours de scrutin, la présidence du comité est attribuée au doyen d'âge des deux candidats les mieux placés.

« Un vice-président est élu dans les mêmes conditions.

« Pour ces élections, le quorum est fixé aux deux tiers des membres du comité.

« Si le président fait partie des catégories 1 à 4 mentionnées à l'article R. 2001, le vice-président est élu parmi les membres des autres catégories et inversement.

« Chapitre II

« Organisation et agrément

« Article R. 2009

« L'organisation des comités est définie par des statuts conformes à des statuts types fixés par décret en Conseil d'Etat.

« Article R. 2010

« Le président du comité sollicite l'agrément de celui-ci auprès du ministre chargé de la santé. Sa demande est accompagnée des documents ou informations suivants :

« 1. Les statuts du comité ;

« 2. L'adresse de son siège et ses moyens prévisionnels de fonctionnement, notamment en personnel ;

« 3. L'identité et la qualité des membres du comité.

« Le comité est agréé par arrêté du ministre chargé de la santé publié au *Journal officiel* de la République française.

« Article R. 2011

« Toute modification concernant les documents ou informations mentionnés à l'article R. 2010 est communiquée au ministre chargé de la santé par le président du comité.

## « Chapitre III

## « Financement et fonctionnement

## « Article R. 2012

« Le produit du droit fixe mentionné à l'article L. 209-11 est attaché par voie de fonds de concours au budget du ministère chargé de la santé, qui le répartit entre les divers comités en fonction notamment de leurs charges et de leur activité. Les modalités de rattachement et de répartition sont fixées par arrêté conjoint des ministres chargés de la santé et du budget.

## « Article R. 2013

« Les fonctions de membre d'un comité consultatif de protection des personnes dans la recherche biomédicale sont gratuites. Les frais, notamment de déplacement, supportés par un membre à l'occasion de sa participation aux travaux du comité, lui sont remboursés sur justification.

« Les rapporteurs mentionnés à l'article R. 2017 perçoivent une indemnité dont le montant est fixé par arrêté des ministres chargés de la santé et du budget.

## « Article R. 2014

« Dans chacune des huit catégories de membres mentionnées à l'article R. 2001, les membres suppléants peuvent remplacer tout membre titulaire de cette catégorie.

## « Article R. 2015

« Les délibérations du comité ne sont valables que si six membres au moins sont présents, dont au moins quatre appartiennent aux catégories 1 à 4 mentionnées à l'article R. 2001 et au moins un appartenant aux autres catégories.

## « Article R. 2016

« Le comité saisi d'un projet de recherche en accuse réception à l'investigateur par lettre recommandée. Il peut entendre l'investigateur. Sur demande de ce dernier, il doit, par décision du président, soit l'entendre en comité plénier ou en comité restreint, soit le faire entendre par le rapporteur désigné. Dans ces cas, l'investigateur peut se faire accompagner par le promoteur ou son représentant mandaté à cet effet.

## « Article R. 2017

« Les séances du comité ne sont pas publiques. Le vote au scrutin secret est de droit sur demande d'un membre présent.

« Les avis sont rendus à la majorité simple des membres présents, sur rapport d'un des membres du comité désigné par le président ou d'une personne qualifiée figurant sur une liste établie par le préfet de région.

« En cas de vote avec partage égal des voix, le président décide à voix prépondérante.

## « Article R. 2018

« Le comité fait connaître par écrit à l'investigateur son avis dans un délai de cinq semaines à compter de la date d'arrivée d'un dossier comprenant toutes les pièces requises en application des articles R. 2029 et R. 2030.

« Si le dossier déposé ne lui permet pas de se prononcer, le comité adresse à l'investigateur dans le délai précité une demande motivée d'informations complémentaires ou de modifications substantielles. Il dispose alors, pour rendre son avis, d'un délai supplémentaire de trente jours.

« Les dossiers, rapports, délibérations et avis sont conservés par le comité, dans des conditions assurant leur confidentialité, pendant un minimum de dix ans.

## « Article R. 2019

« Les modalités de fonctionnement du comité sont précisées par un règlement intérieur annexé aux statuts.

## « Article R. 2020

« Avant le 31 mars de chaque année, chaque comité adresse au ministre chargé de la santé et au préfet de région un rapport d'activité et une copie de son compte financier relatifs à l'année civile précédente.

## « TITRE II

## « Autorisation des lieux de recherches biomédicales sans bénéfice individuel direct

## « Article R. 2021

« Les lieux de recherches biomédicales sans bénéfice individuel direct doivent comporter en tant que de besoin :

« 1. Des locaux d'une superficie, d'une distribution et d'un aménagement compatibles avec un bon déroulement des activités de recherche prévues, et consacrés à la recherche pendant toute la durée de ces activités ;

« 2. Des moyens en équipements et en personnels permettant d'assurer une surveillance clinique constante et des soins d'urgence, ainsi que la possibilité d'effectuer, si nécessaire, un transfert immédiat dans un service de soins approprié ;

« 3. Un nombre de lits en rapport avec les activités prévues ;

« 4. Une organisation permettant :

« a) De recueillir et de conserver des échantillons biologiques ;

« b) D'entreposer les médicaments, produits, substances, objets ou matériels sur lesquels portent les recherches, sans préjudice de l'application des dispositions de l'article L. 577 ter du code de la santé publique ;

« c) D'assurer la maintenance des objets et matériels expérimentés ;

« d) D'archiver et de protéger les données et informations relatives aux recherches et aux personnes qui s'y prêtent ;

« e) En cas de préparation d'aliments, de disposer de locaux séparés réservés à cet effet.

« Dans le cas de recherches pratiquées sous forme ambulatoire, des dispositions doivent être prévues pour assurer les mêmes garanties de sécurité.

## « Article R. 2022

« Les modalités d'utilisation, de vérification et d'entretien des équipements ainsi que d'entretien des locaux sont précisées dans un document.

## « Article R. 2023

« La demande d'autorisation est adressée au préfet de région par lettre recommandée avec demande d'avis de réception. Elle doit comporter les éléments suivants :

« 1. Les nom, qualités et fonctions du demandeur ;

« 2. Le nom, l'adresse et la localisation du lieu de recherches ;

« 3. La nature des recherches envisagées ;

« 4. La description précise des éléments mentionnés à l'article R. 2021 ;

« 5. La localisation du service de soins auquel il pourra être fait appel en cas d'urgence.

## « Article R. 2024

« Lorsque le lieu de recherches relève d'une personne morale, publique ou privée, la demande, pour être recevable, doit être visée par une personne habilitée à engager celle-ci.

## « Article R. 2025

« L'autorisation susmentionnée est délivrée par le ministre chargé de la santé après enquête effectuée par un médecin ou un pharmacien inspecteur de la santé.

## « Article R. 2026

« Tout changement du titulaire de l'autorisation, toute modification dans la nature des recherches ou affectant de façon substantielle les conditions d'aménagement, d'équipement ou de fonctionnement doit faire l'objet d'une déclaration.

« Les déclarations de modifications sont adressées au préfet de région dans la forme prévue à l'article R. 2023, accompagnées des justifications appropriées.

## « Article R. 2027

« L'autorisation peut être retirée par le ministre chargé de la santé si les conditions d'aménagement, d'équipement, d'entretien ou de fonctionnement ne sont plus adaptées à la nature

es recherches ou compatibles avec les impératifs de sécurité des personnes qui s'y prêtent, après que le titulaire de l'autorisation a été mis à même de présenter ses observations.

« En cas d'urgence, le ministre peut sans formalité préalable suspendre l'autorisation.

#### « Article R. 2028

« Par dérogation aux dispositions des articles R. 2023, 2025, R. 2026 et R. 2027, lorsque le lieu de recherches relève du ministre de la défense, la demande d'autorisation ou la déclaration de modifications est adressée par celui-ci au ministre chargé de la santé, par l'intermédiaire du haut fonctionnaire de défense. L'autorisation est délivrée ou retirée par le ministre chargé de la santé.

#### « TITRE III

Informations communiquées par l'investigateur au comité consultatif de protection des personnes dans la recherche biomédicale

#### « Article R. 2029

« Avant que soit entreprise une recherche biomédicale sur l'être humain, l'investigateur unique ou coordonnateur communiqué au comité consultatif de protection des personnes dans la recherche biomédicale dont il sollicite l'avis :

« 1. Des renseignements sur la nature et les modalités de la recherche :

« a) L'identité du promoteur de la recherche et celle du fabricant du médicament, produit, objet ou matériel expérimenté, si ce fabricant est distinct du promoteur ;

b) Le titre et l'objectif de la recherche, en précisant s'il s'agit d'une recherche avec ou sans bénéfice individuel direct ;

c) Toutes informations utiles sur le médicament, produit, objet ou matériel ou méthode expérimenté ;

d) L'identité du ou des investigateurs pressentis, leurs titres, expérience et fonctions ;

e) Une synthèse du dernier état des connaissances scientifiques requises pour la mise en œuvre de la recherche, selon sa nature, dans les domaines chimique, technologique, pharmacologique, biologique, pharmacologique, toxicologique et clinique, dénommées prérequis, accompagnée des références des principaux travaux exploités pour cette synthèse ;

f) Les éléments du protocole de la recherche, et notamment la méthodologie clinique, permettant au comité de se prononcer sur la pertinence générale du projet ;

g) Les informations sur le ou les lieux où la recherche se déroulera et sur les personnels et équipements prévus, permettant au comité de se prononcer sur l'adéquation entre les moyens poursuivis et les moyens mis en œuvre ;

h) La nature des informations communiquées aux investisseurs.

« 2. Des renseignements attestant que les garanties prévues pour les personnes qui se prêtent à la recherche sont respectées :

« a) Les références des autorisations ou homologations éventuellement obtenues en France ou à l'étranger pour le médicament, produit, objet ou matériel expérimenté, ainsi que les éventuelles décisions de refus, de suspension ou de retrait de telles autorisations ou homologations ;

b) Les informations qui seront données en application de l'article L. 209-9, et notamment :

1° L'objectif de la recherche, sa méthodologie et sa durée ;

2° Les bénéfices attendus, les contraintes et les risques prévisibles, liés soit à la recherche soit au traitement proposé ;

3° Le droit pour les personnes sollicitées de refuser de participer à la recherche ou de retirer leur consentement à tout moment sans encourir aucune responsabilité.

c) Les modalités de recueil du consentement de ces personnes, y compris le ou les documents qui leur seront remis ;

d) Une copie de l'attestation d'assurance souscrite par le promoteur de la recherche ;

« 3. En outre, lorsque la recherche projetée est une recherche sans bénéfice individuel direct :

a) La ou les autorisations accordées pour chaque lieu de recherches ;

b) Le montant des indemnités éventuellement dus aux personnes qui se prêteront à la recherche ;

c) La durée de la période d'exclusion.

#### « Article R. 2030

« Toute modification du projet de recherche affectant de manière substantielle les informations communiquées au comité doit faire l'objet d'une demande d'avis complémentaire, accompagnée des justifications appropriées.

#### « Article R. 2031

« Les demandes d'avis mentionnées aux articles R. 2029 et R. 2030 sont adressées au comité par lettre recommandée avec demande d'avis de réception.

#### « TITRE IV

« Informations communiquées par le promoteur au ministre chargé de la santé dans sa lettre d'intention

#### « Article R. 2032

« Avant de réaliser ou de faire réaliser une recherche biomédicale sur l'être humain, le promoteur de cette recherche déclare son intention au ministre chargé de la santé en lui faisant connaître :

« 1. Son identité ;

« 2. Le titre et l'objectif de la recherche, en précisant s'il s'agit d'une recherche avec ou sans bénéfice individuel direct ;

« 3. L'identité du ou des investigateurs pressentis, leurs titres, expérience et fonctions ;

« 4. L'identité du fabricant du médicament, produit, objet ou matériel si ce fabricant est distinct du déclarant ;

« 5. Les références des autorisations ou homologations éventuellement obtenues en France ou à l'étranger pour le médicament, produit, objet ou matériel expérimenté, ainsi que les éventuelles décisions de refus, de suspensions ou de retrait de telles autorisations ou homologations ;

« 6. S'il y a lieu, l'identité de l'importateur ;

« 7. Le ou les lieux où la recherche se déroulera et, le cas échéant, les références de la ou des autorisations accordées pour chaque lieu de recherches sans bénéfice individuel direct ;

« 8. L'avis du comité consultatif de protection des personnes consulté sur le projet en application de l'article L. 209-12 ;

« 9. La raison sociale de l'entreprise d'assurance et le numéro du contrat souscrit par le promoteur ;

« 10. La date à laquelle il est envisagé de commencer la recherche et la durée prévue de cette dernière.

#### « Article R. 2033

« Si la recherche porte sur un médicament, un produit défini à l'article L. 658-11 ou un produit ou objet contraceptif, le promoteur indique, outre les informations prévues à l'article R. 2032 :

« 1. La phase d'expérimentation clinique ;

« 2. Le type d'essai ;

« 3. S'il y a lieu, l'indication thérapeutique faisant l'objet de l'essai ;

« 4. La posologie du médicament ou produit étudié et, s'il y a lieu, du médicament ou produit de référence ;

« 5. La durée du traitement ;

« 6. Les principaux critères d'inclusion et le nombre prévu des personnes devant se prêter à la recherche ;

« 7. Pour le médicament ou produit étudié :

« a) Sa dénomination spéciale ou scientifique ou son nom de code ;

« b) Sa forme pharmaceutique ;

« c) Sa composition qualitative et quantitative, en utilisant les dénominations communes internationales lorsqu'elles existent ou, à défaut, les dénominations de la Pharmacopée européenne ou française ;

« d) La présence éventuelle d'un principe actif nouveau ;

« e) L'indication, si elle est connue, des classes chimiques, pharmacologiques et cliniques auxquelles appartient le principe actif ;

« f) Le lieu de fabrication du médicament ou produit.

« 8. Pour un médicament ou produit de référence :

« a) Sa dénomination spéciale ou scientifique ;

« b) Sa forme pharmaceutique ;

« c) Sa composition qualitative et quantitative en principes actifs ;

« d) Son lieu de fabrication ;

« 9. Pour un placebo :

« a) Sa forme pharmaceutique ;

« b) Son lieu de fabrication.

## « Article R. 2034

« Si la recherche porte sur un matériel ou un objet autre que contraceptif, le promoteur communique, outre les informations prévues à l'article R. 2032 :

« 1. Les résultats des essais réalisés *in vitro* et chez l'animal ainsi que la synthèse des essais préalables qui auraient pu être effectués chez l'homme ;

« 2. Un résumé du protocole de la recherche ;

« 3. Les documents attestant la conformité du matériel ou de l'objet aux exigences essentielles de sécurité et de santé et, selon le cas, aux normes françaises, aux normes des communautés européennes, aux normes internationales ou, à défaut, à toute norme étrangère ;

« 4. Toutes autres informations utiles relatives au matériel ou à l'objet, à son fonctionnement et à son utilisation.

## « Article R. 2035

« Pour toute autre recherche, le promoteur communique, outre les informations prévues à l'article R. 2032, le protocole de la recherche et toutes informations sur le produit ou la méthode expérimentés.

## « Article R. 2036

« La lettre d'intention est adressée au ministre chargé de la santé par envoi recommandé avec demande d'avis de réception.

« S'il s'agit d'une recherche sans bénéfice individuel direct dont le promoteur est le ministère de la défense, la lettre d'intention est adressée par l'intermédiaire du haut fonctionnaire de défense auprès du ministre chargé de la santé.

## « Article R. 2037

« Toute modification de la recherche affectant de manière substantielle des informations prévues ci-dessus doit faire l'objet d'une communication complémentaire adressée au ministre dans la forme prévue à l'article R. 2036.

## « TITRE V

## « Dispositions financières

## « Article R. 2038

« Les objets ou matériels ainsi que les médicaments ou produits mentionnés à l'article R. 5123 sont fournis gratuitement, ou mis gratuitement à disposition pendant le temps de l'essai par le promoteur.

« Le promoteur prend en charge les frais supplémentaires liés à d'éventuels fournitures ou examens spécifiquement requis par le protocole de l'essai.

« Si la mise en œuvre du protocole est de nature à entraîner des frais supplémentaires de fonctionnement pour un établissement public ou privé, le promoteur prend ces frais en charge.

« Lorsque l'essai est réalisé dans un établissement public ou privé, la prise en charge des frais mentionnés aux deux précédents alinéas fait l'objet d'une convention conclue entre le promoteur et le représentant légal de cet établissement.

## « TITRE VI

« Fichier national des personnes qui se prêtent à des recherches biomédicales sans bénéfice individuel direct

## « Article R. 2039

« Il est créé un fichier automatisé, dénommé "Fichier national des personnes qui se prêtent à des recherches biomédicales sans bénéfice individuel direct". Ce fichier est géré par le ministre chargé de la santé.

« Les informations contenues dans le fichier ont pour objet d'assurer le respect des dispositions des articles L. 209-15 et L. 209-17 relatives :

« a) À l'interdiction de se prêter simultanément à plusieurs recherches biomédicales sans bénéfice individuel direct ;

« b) À la période d'exclusion au cours de laquelle la personne ne peut se prêter à aucune autre recherche biomédicale sans bénéfice individuel direct ;

« c) Au montant total des indemnités perçues par cette personne.

## « Article R. 2040

« Le fichier est alimenté, consulté et mis à jour par les investigateurs des recherches. Son accès est subordonné à l'utilisation de codes d'accès confidentiels attribués aux titulaires d'au-

torisation de lieux de recherches sans bénéfice individuel direct et aux investigateurs exerçant dans ces lieux. Ces codes sont changés au moins une fois par an et ne peuvent être réattribués.

## « Article R. 2041

« Le fichier comporte, sur chaque personne, ci-après dénommée "volontaire", qui se prête ou s'est prêtée, dans les douze mois écoulés, à une recherche sans bénéfice individuel direct, les données suivantes :

« a) L'identification du ou des lieux de recherches ;

« b) Les trois premières lettres du nom patronymique du volontaire ;

« c) Les deux premières lettres de son premier prénom ;

« d) Sa date de naissance ;

« e) Les dates de début et de fin de sa participation à la recherche ;

« f) La date d'expiration de la période d'exclusion en cours, ou de la dernière période écoulée, fixée en application du deuxième alinéa de l'article L. 209-17 ;

« g) S'il y a lieu, le montant total des indemnités que le volontaire a pu percevoir au cours des douze derniers mois, ou qu'il doit percevoir, en application de l'article L. 209-15.

## « Article R. 2042

« Avant de recruter un volontaire pour une recherche, l'investigateur s'assure, en consultant le fichier :

« a) Que cette personne ne sera pas empêchée de participer à ladite recherche par une éventuelle participation ou période d'exclusion concomitante ;

« b) Que la somme de l'indemnité éventuellement due et de celles que l'intéressé a déjà pu percevoir au cours des douze mois précédents n'excède pas le maximum annuel fixé par le ministre chargé de la santé en application de l'article L. 209-15.

## « Article R. 2043

« Pour appliquer la règle du maximum annuel d'indemnités, les indemnités sont réputées versées aux dates de début de participation de l'intéressé aux essais.

## « Article R. 2044

« Lorsqu'il recrute un volontaire pour une recherche, l'investigateur enregistre dans le fichier :

« a) Son code d'accès ;

« b) Les trois premières lettres du nom patronymique du volontaire, les deux premières lettres de son premier prénom et sa date de naissance ;

« c) Les dates de début et de fin de participation de l'intéressé à la recherche ;

« d) La date d'expiration de la période d'exclusion prévue ;

« e) Le montant de l'indemnité éventuellement due.

## « Article R. 2045

« Les données relatives aux volontaires sont détruites à l'issue d'un délai de douze mois suivant le début de la dernière participation à une recherche, sous réserve que la période d'exclusion fixée pour cette recherche soit achevée.

## « Article R. 2046

« Les volontaires sont informés par l'investigateur de l'existence du fichier et des données qui y sont contenues. Cette information est rappelée dans le résumé écrit remis aux intéressés en application du quatrième alinéa de l'article L. 209-9.

« Les volontaires peuvent vérifier auprès du titulaire de l'autorisation du lieu de recherches ou du ministre chargé de la santé l'exactitude des données les concernant présentes dans le fichier. Ils peuvent également vérifier la destruction de ces données au terme du délai prévu à l'article R. 2045. »

Art. 3. - La section II (Spécialités pharmaceutiques) du chapitre II du titre II du livre V (partie Réglementaire) du code de la santé publique est modifiée ainsi qu'il suit :

I - L'article R. 5117 est abrogé et remplacé par les dispositions suivantes :

« Article R. 5117

« On entend par expérimentation des médicaments, au sens du 6 de l'article L. 605, toutes recherches, essais, ou expérimentations, ci-après dénommés essais, auxquels il est procédé :

« 1<sup>o</sup> En vue de l'obtention d'une autorisation de mise sur le marché ;

« 2<sup>o</sup> Après la délivrance de cette autorisation.

« Sans préjudice des dispositions législatives et réglementaires du livre II bis du présent code, ces essais sont réalisés dans les conditions fixées au présent paragraphe. »

II. - Le second alinéa de l'article R. 5118 est ainsi rédigé :

« Les essais doivent être réalisés en conformité avec les bonnes pratiques de laboratoire et les bonnes pratiques cliniques dont les principes sont fixés par arrêtés du ministre chargé de la santé. »

III. - Après l'article R. 5119, il est inséré un article R. 5119-1 ainsi rédigé :

« Article R. 5119-1

« Les personnes qui dirigent et surveillent la réalisation d'essais chimiques, pharmaceutiques, biologiques, pharmacologiques ou toxicologiques sont dénommées expérimentateurs.

« Les médecins qui dirigent et surveillent la réalisation d'essais cliniques sont dénommés investigateurs.

« Les expérimentateurs et les investigateurs doivent, selon leur activité, disposer des qualifications et de l'expérience mentionnées à l'article R. 5119. »

IV. - Les articles R. 5120 à R. 5127 sont abrogés et remplacés par les dispositions suivantes :

« Article R. 5120

« Sous réserve des dispositions de l'article L. 209-12 du présent code et de celles prises pour leur application, les expérimentateurs, les investigateurs et toutes personnes appelées à collaborer aux essais sont tenus au secret professionnel en ce qui concerne notamment la nature des produits étudiés, les essais, les personnes qui s'y prêtent et les résultats obtenus.

« Ils ne peuvent, sans l'accord du promoteur, donner d'informations relatives aux essais qu'au ministre chargé de la santé et aux médecins et pharmaciens inspecteurs mentionnés à l'article L. 209-13.

« Les essais ne peuvent faire l'objet d'aucun commentaire écrit ou oral sans l'accord conjoint de l'expérimentateur ou de l'investigateur et du promoteur.

« Article R. 5121

« Le promoteur communique aux expérimentateurs des essais chimiques, pharmaceutiques, biologiques, pharmacologiques ou toxicologiques :

« 1. Le titre et l'objectif de l'essai demandé ;

« 2. L'identification du médicament soumis à l'essai :

« a) Sa dénomination spéciale ou scientifique ou son nom de code ;

« b) Sa forme pharmaceutique ;

« c) Sa composition qualitative et quantitative, en utilisant les dénominations communes internationales lorsqu'elles existent ou, à défaut, les dénominations de la pharmacopée européenne ou française ;

« d) Son ou ses numéros de lot ;

« 3. La synthèse des prérequis mentionnée à l'article R. 2029 du présent code, accompagnée des références des principaux travaux exploités pour cette synthèse.

« Article R. 5122

« Le promoteur communique aux investigateurs d'essais cliniques :

« 1. Le titre et l'objectif de l'essai demandé ;

« 2. Pour le médicament soumis à l'essai :

« a) Sa dénomination spéciale ou scientifique ou son nom de code ;

« b) Sa forme pharmaceutique ;

« c) Sa composition qualitative et quantitative, en utilisant les dénominations communes internationales lorsqu'elles existent ou, à défaut, les dénominations de la pharmacopée européenne ou française ;

« d) Son ou ses numéros de lot ;

« e) Sa date de péremption ;

« 3. Pour un médicament de référence :

« a) Sa dénomination spéciale ou scientifique ;

« b) Sa forme pharmaceutique ;

« c) Sa composition qualitative et quantitative en principes actifs ;

« d) Son ou ses numéros de lot ;

« e) Sa date de péremption.

« 4. Pour un placebo :

« a) Sa forme pharmaceutique ;

« b) Sa composition ;

« c) Son ou ses numéros de lot ;

« d) Sa date de péremption.

« 5. Les informations qui seront données, en application de l'article L. 209-9, aux personnes sollicitées de se prêter à l'essai et les modalités de recueil du consentement de ces personnes, y compris le ou les documents qui leur seront remis ;

« 6. Une copie de l'attestation d'assurance ;

« 7. Le cas échéant, la période d'exclusion mentionnée à l'article L. 209-17 ;

« 8. L'avis du comité consultatif de protection des personnes consulté sur le projet en application de l'article L. 209-12, si l'investigateur n'en dispose pas déjà ;

« 9. La synthèse des prérequis mentionnée à l'article R. 2029 du présent code, accompagnée des références des principaux travaux exploités pour cette synthèse ;

« 10. Le protocole de l'essai clinique ;

« 11. Les références des autorisations de mise sur le marché éventuellement obtenues en France ou à l'étranger pour le médicament ainsi que celles des éventuelles décisions de refus, de suspension ou de retrait de telles autorisations ;

« 12. L'identité des autres investigateurs qui participent au même essai et les lieux où ils conduisent leurs travaux.

« Les investigateurs peuvent demander au promoteur tout document ou essai complémentaire s'ils s'estiment insuffisamment éclairés par les informations fournies.

« Article R. 5123

« Les médicaments ou produits soumis à l'essai et les éventuels médicaments de référence ou produits de référence ou placebos doivent être préparés selon les bonnes pratiques de fabrication dont les principes sont fixés par arrêté du ministre chargé de la santé.

« L'étiquetage de ces médicaments ou produits comporte :

« 1. Le nom du promoteur et son adresse ;

« 2. La référence de l'essai en cours ;

« 3. La référence permettant de connaître leur formule intégrale, leur numéro de lot de fabrication, leur date de péremption ;

« 4. Les indications nécessaires à leur bonne conservation ;

« 5. L'inscription suivante : " Utilisation sous stricte surveillance médicale (art. R. 5123 du code de la santé publique)". »

« Article R. 5124

« Lorsqu'un essai clinique est conduit dans un établissement public ou privé, le promoteur fait connaître préalablement au directeur de l'établissement, pour information :

« 1. Le titre de l'essai ;

« 2. L'identité du ou des investigateurs et le ou les lieux concernés dans l'établissement ;

« 3. La date à laquelle il est envisagé de commencer l'essai et la durée prévue de celui-ci ;

« 4. Les éléments du protocole et toutes autres informations utiles pour l'application des dispositions de l'article R. 2038.



## « Article R. 5124-1

« Lorsqu'un essai clinique est conduit dans un établissement, public ou privé, titulaire d'une licence de pharmacie, le promoteur communique préalablement au pharmacien de l'établissement, pour information :

- « 1. Le titre et l'objectif de l'essai ;
- « 2. a) Pour un médicament soumis à l'essai, les renseignements mentionnés au 2 de l'article R. 5122 ;
- « b) Pour un médicament de référence, les renseignements mentionnés au 3 de l'article R. 5122 ;
- « c) Pour un placebo, les renseignements mentionnés au 4 de l'article R. 5122 ;
- « 3. La synthèse des prérequis mentionnée à l'article R. 2029 du présent code, accompagnée des références des principaux travaux exploités pour cette synthèse ;
- « 4. Les éléments du protocole de l'essai clinique utiles pour la détention et la dispensation des médicaments et produits employés ;
- « 5. L'identité du ou des investigateurs et le ou les lieux concernés dans l'établissement ;
- « 6. La date à laquelle il est envisagé de commencer l'essai et la durée prévue de celui-ci.

## « Article R. 5125

« Le directeur et le pharmacien mentionnés aux articles R. 5124 et R. 5124-1 sont soumis aux obligations définies à l'article R. 5120.

## « Article R. 5126

« En cas de nécessité impérieuse pour la santé publique, le promoteur peut être autorisé à fournir à titre onéreux à des établissements de soins un médicament dans des conditions fixées par les ministres chargés de la santé et de la sécurité sociale.

« Cette autorisation ne peut être accordée qu'après avis de la commission mentionnée à l'article R. 5140, et lorsque toutes les conditions suivantes sont réunies :

- « 1. Le médicament concerné est destiné à traiter une maladie grave ;
- « 2. Il ne peut être remplacé par un autre traitement ;
- « 3. Il existe des preuves d'efficacité et de sécurité suffisantes pour permettre son utilisation dans des conditions approuvées par le ministre chargé de la santé ;
- « 4. Une demande d'autorisation de mise sur le marché français a été déposée ou une lettre d'engagement de dépôt d'une telle demande a été adressée au ministre chargé de la santé ;
- « 5. Le promoteur s'engage à poursuivre les essais nécessaires pour la constitution du dossier d'autorisation de mise sur le marché.

« L'autorisation mentionnée au deuxième alinéa du présent article est accordée pour une durée maximale d'un an.

## « Article R. 5127

« Tout essai donne lieu à un rapport établi par l'expérimentateur ou l'investigateur qui a réalisé cet essai. Ce rapport doit être daté et signé et rappeler :

- « 1. L'identité du ou des expérimentateurs ou investigateurs, leurs titres, expérience et fonctions ;
- « 2. Les dates et lieux de réalisation de l'essai ;
- « 3. Pour le médicament soumis à l'essai, les renseignements mentionnés au 2 de l'article R. 5122 ;
- « 4. Pour un médicament de référence, les renseignements mentionnés au 3 de l'article R. 5122 ;
- « 5. Pour un placebo, les renseignements mentionnés au 4 de l'article R. 5122. »

Art. 4. - Le début du premier alinéa de l'article R. 5140 du code de la santé publique est modifié comme suit :

« Les décisions mentionnées aux articles R. 5126, R. 5135... »  
(Le reste sans changement.)

Art. 5. - Il est ajouté au livre V du code de la santé publique (partie Réglementaire) l'article R. 5266-16 suivant :

## « Article R. 5266-16

« Les essais auxquels il est procédé en vue de l'autorisation prévue à l'article L. 658-11 ou après la délivrance de cette autorisation sont soumis aux conditions fixées aux articles R. 5117 à R. 5127. »

Art. 6. - L'article 2 du décret n° 69-104 du 3 février 1969, susvisé est complété par les dispositions suivantes :

« Les essais, réalisés avant ou après la délivrance de l'autorisation de mise sur le marché, sont soumis aux conditions fixées aux articles R. 5117 à R. 5127 du code de la santé publique. »

Art. 7. - Par dérogation transitoire aux dispositions du titre II du livre II bis (partie Réglementaire) du code de la santé publique et sous réserve qu'ils aient fait l'objet du dépôt d'un dossier complet de demande d'autorisation dans les trois mois suivant la date de publication du présent décret, les lieux de recherches sans bénéfice individuel direct en activité à cette date pourront continuer de fonctionner jusqu'à ce que le ministre chargé de la santé se soit prononcé sur leur demande.

Les mêmes dérogations s'appliquent pour l'autorisation des lieux de recherches mentionnés à l'article R. 2028.

Art. 8. - Le ministre d'Etat, ministre de l'économie, des finances et du budget, le garde des sceaux, ministre de la justice, le ministre de la défense, le ministre de l'intérieur, le ministre de la solidarité, de la santé et de la protection sociale, le ministre de la recherche et de la technologie et le ministre délégué auprès du ministre d'Etat, ministre de l'économie, des finances et du budget, chargé du budget, sont chargés, chacun en ce qui le concerne, de l'exécution du présent décret, qui sera publié au *Journal officiel* de la République française.

Fait à Paris, le 27 septembre 1990.

MICHEL ROCARD

Par le Premier ministre :

*Le ministre de la solidarité, de la santé  
et de la protection sociale,*  
CLAUDE ÉVIN

*Le ministre d'Etat, ministre de l'économie,  
des finances et du budget,*  
PIERRE BÉRÉGOVOY

*Le garde des sceaux, ministre de la justice,*  
PIERRE ARPAILLANGE

*Le ministre de la défense,*  
JEAN-PIERRE CHEVÈNEMENT

*Le ministre de l'intérieur,*  
PIERRE JOXE

*Le ministre de la recherche et de la technologie,*  
HUBERT CURIEN

*Le ministre délégué auprès du ministre d'Etat,  
ministre de l'économie, des finances et du budget,  
chargé du budget,*  
MICHEL CHARASSE

Arrêté du 29 juin 1990  
portant transformation de lits d'hospice

NOR : SP5A9001979A

Par arrêté du ministre de la solidarité, de la santé et de la protection sociale en date du 29 juin 1990, il est créé quinze lits de long séjour et soixante-dix-huit lits de maison de retraite par transformation des lits d'hospice à l'hôpital de Pornic (Loire-Atlantique).

Arrêté du 13 septembre 1990 complétant ou modifiant  
le tarif interministériel des prestations sanitaires

NOR : SPSP9001983A

Le ministre de la solidarité, de la santé et de la protection sociale et le secrétaire d'Etat chargé des anciens combattants et des victimes de guerre,

Vu le code de sécurité sociale, et notamment ses articles R. 165-1 à R. 165-29 ;

Vu le code des pensions militaires d'invalidité et des victimes de guerre, et notamment son article R. 102-1 ;

Vu le livre VII du code rural ;

Vu l'arrêté du 20 février 1950 fixant certains titres du tarif interministériel des prestations sanitaires, complété et modifié par les textes subséquents ;

MICHEL ROCARD

ANNEXE

Par le Premier ministre :  
*ministre de la solidarité, de la santé,  
 et de la protection sociale,*  
 CLAUDE ÉVIN  
*Le ministre d'Etat, ministre de l'économie,  
 des finances et du budget,*  
 PIERRE BÉRÉGOVOY  
*ministre de l'équipement, du logement,  
 des transports et de la mer,*  
 MICHEL DELEBARRE  
*Le ministre de l'agriculture et de la forêt,*  
 HENRI NALLET  
*Le ministre délégué auprès du ministre d'Etat,  
 ministre de l'économie, des finances et du budget,  
 chargé du budget,*  
 MICHEL CHARASSE  
*Le ministre délégué auprès du ministre de l'équipement,  
 du logement, des transports et de la mer,  
 chargé du logement,*  
 LOUIS BESSON  
*secrétaire d'Etat auprès du ministre de la solidarité  
 de la santé et de la protection sociale,  
 chargé de la famille,*  
 HÉLÈNE DORLHAC DE BORNE

Arrêté du 17 septembre 1990 portant modification des statuts types obligatoires des caisses de base de l'organisation autonome d'assurance vieillesse des travailleurs non salariés des professions industrielles et commerciales

NOR : SPSS9001990A

Le ministre de la solidarité, de la santé et de la protection sociale, le ministre délégué auprès du ministre de l'industrie et de l'aménagement du territoire, chargé du commerce et de l'artisanat, et le directeur du territoire, chargé du commerce et de l'artisanat, ont arrêté, en vertu de l'article L. 633-8 du code de la sécurité sociale, et notamment le livre VI, articles III, article L. 633-8 :

1/ l'arrêté du 23 janvier 1981 portant approbation des statuts types obligatoires des caisses de base de l'organisation autonome d'assurance vieillesse des travailleurs non salariés des professions industrielles et commerciales ;

2/ la proposition de la Caisse nationale de l'organisation autonome d'assurance vieillesse des travailleurs non salariés des professions industrielles et commerciales en date du 14 décembre 1989.

Arrêtent :

Art. 1<sup>er</sup>. - Sont approuvées telles qu'elles sont annexées au présent arrêté les modifications apportées aux articles 1<sup>er</sup>, 3, 5, 10, 12, et 18 des statuts types obligatoires des caisses de base de l'organisation autonome d'assurance vieillesse des travailleurs non salariés des professions industrielles et commerciales.

Art. 2. - Le directeur de la sécurité sociale au ministère de la solidarité, de la santé et de la protection sociale est chargé de l'exécution du présent arrêté, qui sera publié au Journal officiel de la République française.

Fait à Paris, le 17 septembre 1990.

*Le ministre de la solidarité, de la santé  
 et de la protection sociale,*

Pour le ministre et par délégation :

Par empêchement du directeur  
 de la sécurité sociale :

*Le sous-directeur de l'assurance vieillesse,*

E. MARIE

*ministre délégué auprès du ministre de l'industrie  
 et de l'aménagement du territoire,  
 chargé du commerce et de l'artisanat,*

Pour le ministre et par délégation :

*Le directeur de l'artisanat,*

J. BÉDIER

À L'ARRÊTÉ DU 17 SEPTEMBRE 1990

Statuts types des caisses de base de l'organisation autonome d'assurance vieillesse des travailleurs non salariés des professions industrielles et commerciales

Article 1<sup>er</sup>

Le premier alinéa est remplacé par les dispositions suivantes :

« La caisse ... créée en application de l'article L. 621-2 du code de la sécurité sociale et dont la gestion et le fonctionnement sont réglementés par le code de la sécurité sociale, et notamment le livre VI, titres II et III, a pour objet de gérer le régime de protection sociale des travailleurs non salariés des professions industrielles et commerciales en ce qui concerne l'assurance vieillesse de base, l'assurance vieillesse complémentaire obligatoire en faveur des conjoints et l'assurance invalidité-décès.

« Elle assure, en outre, pour le compte de la caisse Organico-complémentaire la gestion du régime de retraite complémentaire facultatif institué en application de l'article L. 635-1 du code de la sécurité sociale.

« Elle exerce une action sociale dans le cadre de la réglementation en vigueur. »

Article 3

Les références : « au livre VIII, titre 1<sup>er</sup>, du code de la sécurité sociale » sont remplacées par les références : « au livre VI, titre II, du code de la sécurité sociale ».

Article 5

I. - Au premier alinéa, les mots : « par le décret n° 79-807 du 18 septembre 1979 » sont remplacés par les mots : « par les articles R. 633-15 à R. 633-48 du code de la sécurité sociale ».

II. - Au deuxième alinéa, les mots : « prévues à l'article 6 du décret susmentionné » sont remplacés par les mots : « prévues à l'article R. 633-20 du code de la sécurité sociale ».

Article 10

Au deuxième alinéa, les mots : « prévu à l'article 19-1 du décret n° 60-452 du 12 mai 1960 » sont remplacés par les mots : « prévu à l'article R. 123-48 du code de la sécurité sociale ».

Article 12

Au troisième alinéa, les mots : « compte tenu des dispositions du décret n° 70-312 du 25 mars 1970 » sont remplacés par les mots : « compte tenu des articles D. 623-2 à D. 623-29 du code de la sécurité sociale ».

Article 13

Au deuxième alinéa, les mots : « définis à l'article 32 du décret n° 70-312 du 25 mars 1970 » sont remplacés par les mots : « définis à l'article D. 623-16 du code de la sécurité sociale ».

Article 18

Les mots : « visés à l'article L. 643 du code de la sécurité sociale » sont remplacés par les mots : « visés à l'article L. 621-3 du code de la sécurité sociale ».

Arrêté du 28 septembre 1990 fixant le nombre de comités consultatifs de protection des personnes dans la recherche biomédicale dans chaque région

NOR : SPSM9002021A

Par arrêté du ministre de la solidarité, de la santé et de la protection sociale en date du 28 septembre 1990, le nombre maximal de comités consultatifs de protection des personnes dans la recherche biomédicale est fixé, pour chaque région, comme suit :

|                           |    |                                 |   |
|---------------------------|----|---------------------------------|---|
| Alsace.....               | 2  | Midi-Pyrénées.....              | 2 |
| Aquitaine.....            | 3  | Nord - Pas-de-Calais.....       | 3 |
| Auvergne.....             | 1  | Basse-Normandie.....            | 1 |
| Bourgogne.....            | 1  | Haute-Normandie.....            | 1 |
| Bretagne.....             | 2  | Pays de la Loire.....           | 2 |
| Centre.....               | 2  | Picardie.....                   | 1 |
| Champagne-Ardenne.....    | 1  | Poitou-Charentes.....           | 1 |
| Corse.....                | 1  | Provence-Alpes-Côte d'Azur..... | 5 |
| Franche-Comté.....        | 1  | Rhône-Alpes.....                | 7 |
| Ile-de-France.....        | 40 | Guadeloupe.....                 | 1 |
| Languedoc-Roussillon..... | 3  | Guyane.....                     | 1 |
| Limousin.....             | 1  | Martinique.....                 | 1 |
| Lorraine.....             | 2  | Réunion.....                    | 1 |

Arrêté du 9 août 1991 portant application de l'article R. 5203 du code de la santé publique dans les établissements mentionnés à l'article L. 577 du même code

NOR : SANM9102011A

Le ministre délégué à la santé,

Vu le code de la santé publique, notamment les articles L. 356, L. 368, L. 370, L. 514, L. 577, L. 626, L. 627, L. 761 et R. 5190 à R. 5219 ;

Vu le décret n° 83-785 du 2 septembre 1983 modifié fixant le statut des internes en médecine et en pharmacie ;

Vu le décret n° 84-689 du 17 juillet 1984 modifié relatif aux actes professionnels et à l'exercice de la profession d'infirmier,

Arrête :

Art. 1<sup>er</sup>. - Sont soumis aux dispositions du présent arrêté les établissements mentionnés à l'article L. 577 du code de la santé publique, disposant d'une pharmacie légalement ouverte et gérée par un pharmacien remplissant les conditions prévues à l'article L. 514 du même code.

#### Section 1

Prescription des médicaments contenant des substances vénéneuses

Art. 2. - Dans les établissements mentionnés à l'article 1<sup>er</sup>, les médicaments contenant des substances vénéneuses ne peuvent être prescrits que par :

a) Les médecins, les chirurgiens-dentistes (dans les limites de l'article L. 368) et les sages-femmes (dans les limites de l'article L. 370) de l'établissement remplissant les conditions définies à l'article L. 356 du code de la santé publique ;

b) Les internes et résidents en médecine ayant reçu délégation des médecins dont ils relèvent ;

c) Les biologistes de l'établissement dans les limites prévues par l'article L. 761 du code de la santé publique.

Le directeur de l'établissement communique à la pharmacie la liste des personnes habilitées à prescrire et en assure la mise à jour. Cette liste comporte les nom, qualité, signature ou tout autre mode d'identification de ces personnes, avec l'intitulé précis de leurs fonctions.

Art. 3. - Les prescriptions de médicaments sont individuelles et effectuées par écrit, datées et signées du prescripteur. La signature doit être authentifiable. L'original de la prescription est conservé dans le dossier médical, une copie est remise à la pharmacie. Toutefois, la prescription peut être faite de manière informatisée sous réserve que le prescripteur soit identifié, la prescription mémorisable et l'édition sur papier possible.

Art. 4. - Les prescriptions mentionnées à l'article 3 doivent comporter :

a) L'identification de l'établissement et de l'unité de soins ;

b) L'identification du prescripteur défini à l'article 2 avec l'intitulé précis de sa fonction ;

c) L'identification précise du malade :

- le nom ;

- le prénom ;

- le sexe ;

- l'âge ;

- le cas échéant, la taille et le poids ;

d) L'identification du ou des médicament(s) :

- la dénomination et, s'il s'agit d'une préparation magistrale, la formule détaillée ;

- la forme pharmaceutique ;

- le dosage ;

- la posologie et la durée du traitement ;

- la voie d'administration ;

e) Toute autre information nécessaire à la dispensation du ou des médicament(s) concerné(s).

Art. 5. - Toutes précautions doivent être prises pour éviter les pertes, les vols et les falsifications des ordonnances. A cet effet, les prescriptions écrites sont effectuées sur des ordonnances réservées à l'usage de l'établissement, extraites de blocs d'ordonnances numérotés et paginés.

Les blocs d'ordonnances et tout tampon d'identification doivent être rangés sous clef.

Toutes autres précautions complémentaires en fonction des caractéristiques de chaque établissement peuvent être prises.

#### Section 2

Dispensation et administration des médicaments contenant des substances vénéneuses

Art. 6. - La dispensation des médicaments est l'acte pharmaceutique associant la délivrance des médicaments à :

- l'analyse pharmaceutique de l'ordonnance médicale ;

- la préparation éventuelle des doses à administrer ;

- la mise à disposition d'informations nécessaires au bon usage des médicaments.

Pour accomplir cette dispensation, le pharmacien peut demander au prescripteur tous renseignements utiles.

Art. 7. - Les médicaments sont délivrés à l'unité de soins globalement ou individuellement sur prescription médicale par des pharmaciens ou sous leur responsabilité par :

- des internes en pharmacie et des étudiants de cinquième année hospitalo-universitaire ayant reçu délégation du pharmacien dont ils relèvent ;

- des préparateurs en pharmacie sous le contrôle effectif des pharmaciens.

Art. 8. - Le pharmacien conserve chronologiquement justification des prescriptions durant trois ans.

Art. 9. - Avant toute administration des médicaments au malade, le personnel infirmier vérifie l'identité du malade et les médicaments, au regard de la prescription médicale.

Pour chaque médicament, la dose administrée et l'heure d'administration sont enregistrées sur un document conservé dans le dossier médical. Ce document peut être communiqué à tout moment au pharmacien sur sa demande.

(suite de la circulaire n° 91-0572)

- 3 -

## Section 3

Détention et étiquetage des médicaments  
contenant des substances vénéreuses

Art. 10. - Les médicaments sont détenus dans des locaux, armoires, ou autres dispositifs de rangement fermés à clef ou disposant d'un mode de fermeture assurant la même sécurité.

Dans tous les cas, ces armoires ou dispositifs de rangement ne doivent contenir que des médicaments, quelles que soient les conditions particulières de leur conservation.

Art. 11. - Le pharmacien décide en accord avec le médecin responsable de l'unité de soins ou à défaut celui désigné par l'ensemble des prescripteurs concernés, de l'organisation, dans l'unité de soins, des dispositifs de rangement des médicaments destinés à répondre aux besoins urgents.

Art. 12. - Le surveillant ou la surveillante de l'unité de soins ou un infirmier ou une infirmière désigné(e) par écrit par le responsable de l'unité de soins fixe, en accord avec le pharmacien, les dispositions propres à éviter toute perte, vol ou emprunt des clefs de ces dispositifs de rangement lorsqu'ils existent.

Les modalités de détention, de mise à disposition et de transmission des clefs sont l'objet d'une procédure écrite.

Art. 13. - Le pharmacien et le médecin responsable de l'unité de soins ou à défaut celui désigné par l'ensemble des prescripteurs concernés déterminent après consultation du surveillant ou de la surveillante, la dotation de médicaments permettant de faire face, dans l'unité concernée, aux besoins urgents.

Ils fixent une liste qualitative et quantitative des médicaments composant cette dotation. Cette liste est établie en deux exemplaires datés et conjointement signés. Un exemplaire est conservé à la pharmacie et l'autre est affiché dans le dispositif de rangement.

Ils désignent un médecin responsable de l'utilisation des médicaments de la dotation.

La dotation est révisée au minimum une fois par an.

Art. 14. - Sans préjudice des dispositions de l'article 21, le renouvellement de la dotation pour besoins urgents ne peut être effectué que sur présentation des doubles des documents de prescription accompagnés d'un état récapitulatif établi selon le modèle ci-dessous et signé par le médecin responsable de l'unité de soins.

Etablissement de ..... N° .....

## Dotation pour besoins urgents

Unité de soins .....

| DÉSIGNATION DU MÉDICAMENT                              | RÉSERVE normale | QUANTITÉ consommée du ..... au ..... | QUANTITÉ demandée |
|--------------------------------------------------------|-----------------|--------------------------------------|-------------------|
|                                                        |                 |                                      |                   |
| Date :                                                 |                 |                                      |                   |
| Signature du médecin responsable de l'unité de soins : |                 |                                      |                   |

Art. 15. - Tout transport de médicaments entre la pharmacie et les unités de soins doit se faire dans des chariots ou conteneurs clos et de préférence fermés à clef ou disposant d'un système de fermeture assurant la même sécurité.

Art. 16. - Le pharmacien ou toute personne désignée par lui doit régulièrement vérifier que la composition de la dotation de médicaments pour besoins urgents est conforme à la liste mentionnée à l'article 13. Il doit notamment contrôler les quantités au regard des prescriptions faites, le mode de détention et le respect des règles d'étiquetage et de conservation des médicaments.

Le procès-verbal de la visite doit être daté et cosigné par le pharmacien et le responsable de l'unité de soins.

Art. 17. Les médicaments doivent être détenus de préférence dans leur conditionnement d'origine ou à défaut dans des récipients étiquetés selon les dispositions suivantes :

Stupéfiants : étiquette blanche avec large filet rouge :

Liste I : étiquette blanche avec large filet rouge :

Liste II : étiquette blanche avec large filet vert.

Ces étiquettes devront comporter :

a) Dans la partie supérieure, inscrites en lettres noires :

- la dénomination de la spécialité ;

- et/ou la dénomination commune internationale ou française du ou des principes actifs ;

- le dosage exprimé en quantité ou en concentration ;

- la forme pharmaceutique ;

- la voie d'administration.

b) Dans la partie inférieure, séparée du contexte par une ligne noire et inscrite en lettres noires, la mention bien lisible « Respecter les doses prescrites ».

L'étiquette du conditionnement doit mentionner le numéro de lot et la date de péremption du médicament qu'il contient. La notice d'information du médicament doit être jointe ou à défaut l'unité de soins doit disposer de la documentation nécessaire.

Art. 18. - Sauf accord écrit des prescripteurs mentionnés à l'article 2, il ne devra être mis ou laissé à la disposition des malades aucun médicament en dehors de ceux qui leur auront été prescrits et dispensés dans l'établissement. Les médicaments dont ils disposent à leur entrée leur seront retirés, sauf accord des prescripteurs précités.

## Section 4

Dispositions particulières concernant les médicaments  
classés comme stupéfiants

Art. 19. - Les médicaments classés comme stupéfiants ne peuvent être délivrés que sur prescription d'une personne désignée à l'article 2 a.

La prescription doit se faire sur une ordonnance extraite d'un carnet à souches numéroté, à feuillets paginés, de couleur rose et réservé exclusivement à cet usage dans l'établissement.

L'ordonnance doit comporter les mentions prévues à l'article 4. Cependant, le prescripteur doit indiquer en toutes lettres la quantité prescrite : nombre d'unités thérapeutiques, s'il s'agit de spécialités, doses ou concentrations de substances et nombre d'unités ou volume, s'il s'agit de préparations magistrales.

Art. 20. - Un relevé nominatif doit être effectué au fur et à mesure de l'administration de tout médicament contenant des stupéfiants sur un document spécial comportant :

- le nom de l'établissement ;

- la désignation de l'unité de soins ;

- la date et l'heure de l'administration ;

- les nom et prénom du malade ;

- la dénomination du médicament ;

- la dose administrée ;

- l'identification du prescripteur ;

- l'identification de la personne ayant procédé à l'administration et sa signature.

Ces relevés nominatifs sont datés et signés par le médecin responsable de l'unité de soins et adressés à la pharmacie qui les conserve pendant trois ans.

Art. 21. - Le renouvellement de quantités prélevées à partir de la dotation pour besoins urgents ne peut être réalisé que sur présentation d'un état récapitulatif figurant sur un imprimé de couleur rose, établi selon le modèle mentionné à l'article 14.

Cet état récapitulatif est accompagné des ordonnances concernant les médicaments qui ont été prélevés dans la dotation pour besoins urgents et des relevés nominatifs prévus à l'article 20.

En outre, le pharmacien peut exiger que lui soient remis les conditionnements primaires correspondant aux quantités consommées.

Art. 22. - Les médicaments contenant des stupéfiants ne doivent être remis par le pharmacien ou les personnes définies à l'article 7 qu'au surveillant ou à la surveillante de l'unité de soins ou à un infirmier ou une infirmière conjointement désigné(e) par le médecin responsable de l'unité de soins et le pharmacien ou le cas échéant au prescripteur lui-même.

Art. 23. - Dans les locaux, armoires ou autres dispositifs de rangement fermés à clef prévus à l'article 10, les stupéfiants sont détenus séparément dans une armoire ou un compartiment spécial banalisé réservé à cet usage et lui-même fermé à clef. Des mesures particulières de sécurité contre toute effraction sont prévues.

Art. 24. - Le directeur de la pharmacie et du médicament, le directeur des hôpitaux et le directeur général de la santé sont chargés, chacun en ce qui le concerne, de l'exécution du présent arrêté, qui sera publié au Journal officiel de la République française.

Fait à Paris, le 9 août 1991.

BRUNO DURIEUX

- **DECLARATION OF HELSINKI**

- 1- English version of the Declaration of Helsinki adopted by the 18th World Medical Assembly, Helsinki, Finland, June 1964 and as revised by the 29th World Medical Assembly, Tokyo, Japan, October 1975
- 2- Extracts of French text of the Declaration of Helsinki included in French version of PACS01 study protocol.

## DECLARATION OF HELSINKI

### Recommendations guiding medical doctors in biomedical research involving human subjects

Adopted by the 18th World Medical Assembly, Helsinki, Finland, June 1964  
and as revised by the 29th World Medical Assembly, Tokyo, Japan, October 1975

#### INTRODUCTION

It is the mission of the medical doctor to safeguard the health of the people. His or her knowledge and conscience are dedicated to the fulfillment of this mission.

The Declaration of Geneva of the World Medical Association binds the doctor with the words: "The health of my patient will be my first consideration," and the International Code of Medical Ethics declares that, "Any act or advice which could weaken physical or mental resistance of a human being may be used only in his interest."

The purpose of biomedical research involving human subjects must be to improve diagnostic, therapeutic and prophylactic procedures and the understanding of the aetiology and pathogenesis of disease.

In current medical practice most diagnostic, therapeutic or prophylactic procedures involve hazards. This applies *a fortiori* to biomedical research.

Medical progress is based on research which ultimately must rest in part on experimentation involving human subjects.

In the field of biomedical research a fundamental distinction must be recognized between medical research in which the aim is essentially diagnostic or therapeutic for a patient, and medical research, the essential object of which is purely scientific and without direct diagnostic or therapeutic value to the person subjected to the research.

Special caution must be exercised in the conduct of research which may affect the environment, and the welfare of animals used for research must be respected.

Because it is essential that the results of laboratory experiments be applied to human beings to further scientific knowledge and to help suffering humanity, The World Medical Association has prepared the following recommendations as a guide to every doctor in biomedical research involving human subjects. They should be kept under review in the future. It must be stressed that the standards as drafted are only a guide to physicians all over the world. Doctors are not relieved from criminal, civil and ethical responsibilities under the laws of their own countries.

#### I. BASIC PRINCIPLES

1. Biomedical research involving human subjects must conform to generally accepted scientific principles and should be based on adequately performed laboratory and animal experimentation and on a thorough knowledge of the scientific literature.
2. The design and performance of each experimental procedure involving human subjects should be clearly formulated in an experimental protocol which should be transmitted to a specially appointed independent committee for consideration, comment and guidance.
3. Biomedical research involving human subjects should be conducted only by scientifically qualified persons and under the supervision of a clinically competent medical person. The responsibility for the human subject must always rest with a medically qualified person and never rest on the subject of the research, even though the subject has given his or her consent.

4. Biomedical research involving human subjects cannot legitimately be carried out unless the importance of the objective is in proportion to the inherent risk to the subject.
5. Every biomedical research project involving human subjects should be preceded by careful assessment of predictable risks in comparison with foreseeable benefits to the subject or to others. Concern for the interests of the subject must always prevail over the interests of science and society.
6. The right of the research subject to safeguard his or her integrity must always be respected. Every precaution should be taken to respect the privacy of the subject and to minimize the impact of the study on the subject's physical and mental integrity and on the personality of the subject.
7. Doctors should abstain from engaging in research projects involving human subjects unless they are satisfied that the hazards involved are believed to be predictable. Doctors should cease any investigation if the hazards are found to outweigh the potential benefits.
8. In publication of the results of his or her research, the doctor is obliged to preserve the accuracy of the results. Reports of experimentation not in accordance with the principles laid down in this Declaration should not be accepted for publication.
9. In any research on human beings, each potential subject must be adequately informed of the aims, methods, anticipated benefits and potential hazards of the study and the discomfort it may entail. He or she should be informed that he or she is at liberty to abstain from participation in the study and that he or she is free to withdraw his or her consent to participation at any time. The doctor should then obtain the subject's freely-given informed consent, preferably in writing.
10. When obtaining informed consent for the research project the doctor should be particularly cautious if the subject is in a dependent relationship to him or her or may consent under duress. In that case the informed consent should be obtained by a doctor who is not engaged in the investigation and who is completely independent of this official relationship.
11. In case of legal incompetence, informed consent should be obtained from the legal guardian in accordance with national legislation. Where physical or mental incapacity makes it impossible to obtain informed consent, or when the subject is a minor, permission from the responsible relative replaces that of the subject in accordance with national legislation.
12. The research protocol should always contain a statement of the ethical considerations involved and should indicate that the principles enunciated in the present Declaration are complied with.

## **II. MEDICAL RESEARCH COMBINED WITH PROFESSIONAL CARE (Clinical Research)**

1. In the treatment of the sick person, the doctor must be free to use a new diagnostic and therapeutic measure, if in his or her judgment it offers hope of saving life, reestablishing health or alleviating suffering.
2. The potential benefits, hazards and discomfort of a new method should be weighed against the advantages of the best current diagnostic and therapeutic methods.
3. In any medical study, every patient - including those of a control group, if any - should be assured of the best proven diagnostic and therapeutic method.
4. The refusal of the patient to participate in a study must never interfere with the doctor-patient relationship.
5. If the doctor considers it essential not to obtain informed consent, the specific reasons for this proposal should be stated in the experimental protocol for transmission to the independent committee (I, 2).
6. The doctor can combine medical research with professional care, the objective being the acquisition of new medical knowledge, only to the extent that medical research is justified by its potential diagnostic or therapeutic value for the patient.

### **III. NON-THERAPEUTIC BIOMEDICAL RESEARCH INVOLVING HUMAN SUBJECTS (Non-Clinical Biomedical Research)**

1. In the purely scientific application of medical research carried out on a human being, it is the duty of the doctor to remain the protector of the life and health of that person on whom biomedical research is being carried out.
2. The subjects should be volunteers - either healthy persons or patients for whom the experimental design is not related to the patient's illness.
3. The investigator or the investigating team should discontinue the research if in his/her or their judgment it may, if continued, be harmful to the individual.
4. In research on man, the interest of science and society should never take precedence over considerations related to the wellbeing of the subject.

♣ ♣ ♣



# DECLARATION D'HELSINKI

|                                                                                                                       |
|-----------------------------------------------------------------------------------------------------------------------|
| <p>RECOMMANDATIONS DESTINEES A GUIDER LES MEDECINS DANS LES<br/>RECHERCHES BIOMEDICALES PORTANT SUR L'ETRE HUMAIN</p> |
|-----------------------------------------------------------------------------------------------------------------------|

Adoptée par la Dix-Huitième Assemblée médicale mondiale à Helsinki, Finlande, 1974, et révisée par la Vingt-neuvième Assemblée médicale mondiale, Tokyo, Japon, 1975.

La mission du médecin est de veiller à la santé de l'homme. Il exerce cette mission dans la plénitude de son savoir et de sa conscience.

Le Serment de Genève engage le médecin à "considérer la santé du patient comme son premier souci" et le Code International d'Ethique Médicale "interdit au médecin de donner un conseil ou de poser un acte médical prophylactique, diagnostique ou thérapeutique qui ne soit pas justifié par l'intérêt direct du patient et, notamment, d'affaiblir la résistance physique ou mentale d'un être humain, à moins de nécessité thérapeutique".

L'objet de la recherche biomédicale portant sur l'être humain doit être l'amélioration des méthodes diagnostiques, thérapeutiques et prophylactiques et la compréhension de l'étiologie et de la pathogénèse des maladies.

Dans la pratique médicale courante, toute méthode diagnostique, thérapeutique ou prophylactique comporte des risques : ceci s'applique a fortiori à la recherche biomédicale..

Le progrès de la médecine est fondé sur la recherche qui, en définitive, doit s'appuyer sur l'expérimentation portant sur l'homme.

L'expérience ne peut être tentée légitimement que si l'importance du but visé est en rapport avec le risque encouru par le sujet.

Avant d'entreprendre une expérience, il faut évaluer soigneusement les risques et les avantages prévisibles pour le sujet ou pour d'autres. Les intérêts du sujet doivent toujours passer avant ceux de la science ou de la société.

Le droit du sujet à sauvegarder son intégrité et sa vie privée doit toujours être respecté. Toutes précautions doivent être prises pour réduire les répercussions de l'étude sur l'intégrité physique et mentale du sujet ou sur sa personnalité.

Un médecin ne doit entreprendre un projet de recherche que s'il estime être en mesure d'en prévoir les risques potentiels. Un médecin doit arrêter l'expérience si les risques se révèlent l'emporter sur les bénéfices escomptés.

Lors de la publication des résultats de la recherche, le médecin doit veiller à ce qu'il ne soit pas porté atteinte à l'exactitude des résultats. Des rapports sur une expérimentation non-conforme aux principes énoncés dans cette déclaration ne devront pas être publiés.

Lors de toute recherche sur l'homme, le sujet éventuel sera informé de manière adéquate des objectifs, méthodes, bénéfices escomptés ainsi que des risques potentiels de l'étude et des désagréments qui pourraient en résulter pour lui. Il (Elle) devra également être informé(e) qu'il (qu'elle) est libre de revenir sur son consentement à tout moment. Le médecin devra obtenir le consentement libre et éclairé du sujet, de préférence par écrit.

Lorsqu'il sollicite le consentement éclairé du sujet au projet de recherche, le médecin devra prendre des précautions particulières si le sujet se trouve vis-à-vis de lui dans une situation de dépendance, ou doit donner son consentement sous la contrainte. Dans ce cas, il serait préférable que le consentement soit sollicité par un médecin non-engagé dans l'expérience en cause et qui soit complètement étranger à la relation médecin-sujet.

Il convient, dans le domaine de la recherche portant sur l'être humain, d'établir une distinction fondamentale entre, d'une part une recherche à but essentiellement diagnostique ou thérapeutique à l'égard du patient, d'autre part, une recherche dont l'objet essentiel est purement scientifique et sans finalité diagnostique ou thérapeutique directe à l'égard du patient.

Des précautions spéciales doivent être prises dans la conduite de recherches pouvant porter atteinte à l'environnement, et le bien-être des animaux employés au cours de recherches doit être protégé.

Comme il s'est avéré indispensable pour le progrès de la science et pour le bien de l'humanité souffrante d'appliquer les résultats des expériences de laboratoire à l'homme, l'Association Médicale Mondiale a rédigé les recommandations qui suivent en vue de servir de guide à tout médecin procédant à des recherches biomédicales. Ces recommandations devront être revues périodiquement dans l'avenir. Il est souligné que ces règles ont été rédigées seulement pour éclairer la conscience des médecins du monde entier. Ceux-ci ne sont pas des médecins du monde entier. Ceux-ci ne sont pas exonérés de leur responsabilité pénale, civile et déontologique à l'égard des lois et règles internes de leur propre pays.

## 1 . P R I N C I P E S D E B A S E

- 1.1. La recherche biomédicale portant sur des êtres humains doit être conforme aux principes scientifiques généralement reconnus et doit être basée sur une expérimentation réalisée en laboratoire et sur l'animal, exécutée de manière adéquate, ainsi que sur une connaissance approfondie de la littérature scientifique.
- 1.2. Le projet et l'exécution de chaque phase de l'expérimentation portant sur l'être humain doivent être clairement définis dans un protocole expérimental qui doit être soumis à un comité indépendant désigné spécialement à cet effet, pour avis et conseils.
- 1.3. L'expérience sur l'être humain doit être menée par des personnes scientifiques qualifiées et sous la surveillance d'un clinicien compétent. La responsabilité à l'égard du sujet de l'expérimentation doit toujours incomber à une personne médicalement qualifiée et ne peut jamais incomber au sujet lui-même, même s'il a donné son consentement.
- 1.4. En cas d'incapacité légale et notamment s'il s'agit d'un mineur, le consentement devra être sollicité auprès du représentant légal, compte tenu des législations nationales. Au cas où une incapacité physique ou mentale rend impossible l'obtention d'un consentement éclairé, l'autorisation des proches parents responsables remplace, sous la même réserve, celle du sujet.
- 1.5. Le protocole de la recherche devra toujours contenir une déclaration sur les considérations éthiques impliquées dans cette recherche et devra indiquer que les principes énoncés dans la présente déclaration sont respectés.

2 . RECHERCHE MEDICALE ASSOCIEE  
AVEC DES SOINS MEDICAUX  
(RECHERCHE CLINIQUE)

- 2.1. Lors du traitement d'un malade, le médecin doit être libre de recourir à une nouvelle méthode diagnostique ou thérapeutique s'il (si elle) juge que celle-ci offre un espoir de sauver la vie, rétablir la santé ou soulager les souffrances du malade.
- 2.2. Le médecin devra peser les avantages, les risques et inconvénients potentiels d'une nouvelle méthode par rapport aux méthodes courantes de diagnostic et de thérapeutique les meilleures.
- 2.3. Lors de toute étude clinique - avec ou sans groupe témoin - le malade devra bénéficier des meilleurs moyens diagnostiques et thérapeutiques disponibles.
- 2.4. Le refus du patient de participer à une étude ne devra en aucun cas porter atteinte aux relations existant entre le médecin et le malade.
- 2.5. Si le médecin estime qu'il est essentiel de ne pas demander le consentement éclairé du sujet, les raisons spécifiques de cette proposition devront être contenues dans le protocole de l'expérimentation envisagée transmis préalablement à un comité indépendant, selon la procédure prévue au paragraphe 1.5 ci-dessus.
- 2.6. Le médecin ne peut associer la recherche biomédicale avec des soins médicaux, en vue de l'acquisition de connaissances médicales nouvelles, que dans la mesure où cette recherche biomédicale est justifiée par une utilité diagnostique ou thérapeutique potentielle à l'égard de son malade.

### 3 . RECHERCHE BIOMEDICALE NON-THERAPEUTIQUE

- 3.1. Dans l'application d'expériences purement scientifiques entreprises sur l'homme, le devoir du médecin est de rester le protecteur de la vie et de la santé du sujet de l'expérience.
- 3.2. Les sujets doivent être des volontaires en bonne santé ou des malades atteints d'une affection étrangère à l'étude.
- 3.3. L'expérimentateur ou l'équipe de recherche doivent arrêter l'expérience si, à leur avis, sa poursuite peut être dangereuse pour le sujet.
- 3.4. Dans la recherche médicale les intérêts de la science et ceux de la société ne doivent jamais prévaloir sur le bien-être du sujet.

## **13-2 INSURANCE CERTIFICATE**

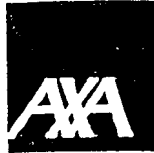

GLOBAL RISKS

INSURANCE CERTIFICATE

CIVIL LIABILITY

SPONSOR OF BIOMEDICAL RESEARCH

• • •

We the undersigned, Axa Global Risks S.A, with headquarters at 26 rue Drouot, Paris 9<sup>th</sup> District, France,

certify that the insured party:

- LA FEDERATION NATIONALE DES CENTRES DE LUTTE CONTRE LE CANCER  
101 RUE DE TOLBIAC  
75854 PARIS CEDEX 13 (FRANCE)

has subscribed to an annual Civil Liability contract under the number 162.000.910, in compliance with French legal and regulatory provisions concerning biomedical research, specifically the provisions of law No. 88.1138 dated 20 Dec. 1988, modified by law No. 90-86 dated 23 Jan. 1990, law No. 94.630 dated 25 July 1994, and decree No. 91.440 dated 14 May 1991.

EXACT NAME OF THE INSURED RESEARCH:

A Phase III Study Evaluating The Benefit Of Docetaxel Given Sequentially With FEC 100 Chemotherapy Treatment In Axillary Lymph Node-Positive Early Breast Cancer Patients

PROTOCOL No. 97001/PHASE 3/NUMBER OF SUBJECTS 1600/

DURATION OF TRIAL: three years from February 1997 to February 2000

The guarantee is in compliance with the insurance obligation established by the legal texts mentioned above, Article L 209-7, to guarantee the financial consequences of the liability to protect persons subjected to biomedical research, which is the sponsor's responsibility in terms of both the sponsor's own liability and that of the investigators.

**THE PRESENT CERTIFICATE DOES NOT COMMIT AXA GLOBAL RISKS S.A. BEYOND THE LIMITS AND TERMS OF THE CONTRACT TO WHICH IT REFERS.**

PARIS, 23 JANUARY 1997

*[AXA Global Risks company stamp]*

FOR THE COMPANY

26 rue Drouot- 75426 Paris Cedex 09, Telephone: +33 1 55 33 80 00, Fax +33 1 55 33 81 00

**13-3 ETHICS COMMITTEE / INVESTIGATIONAL  
REVIEW BOARD APPROVAL**



COMITÉ CONSULTATIF de PROTECTION des PERSONNES dans la RECHERCHE BIOMÉDICALE  
TOULOUSE I (Toulouse I Ethics Committee)

Secretary: Ms. Fourtané - Finance and Budget Division - Hôtel Dieu - 31052 Toulouse (France)  
Tel.: 05 61 77 83 56 - Fax: 05 61 77 84 11

Dr. Roché  
Centre Claudius Regaud

La Grave (France)

Toulouse, 18 February 1997

Dear Sir,

In its meeting on 17 February 1997, the Ethics Committee/IRB of Toulouse I examined the research project you submitted as coordinating investigator, entitled:

**A Phase III Study Evaluating The Benefit Of Docetaxel Given Sequentially With FEC 100 Chemotherapy Treatment In Axillary Lymph Node-Positive Early Breast Cancer Patients - Protocol No. 97001**

sponsored by the *Fédération Nationale des Centres de Lutte contre le Cancer (French National Federation of Cancer Treatment Centers)*

Members present: Ms. Blaes, Mr. Bugat, Mr. Doyon, Mr. Marc-Vergnes (Group 1), Ms. Goeury, Mr. Houin (Group 3), Ms. Ricci (Group 6)

Also present at the meeting as substitutes: Ms. Mhura (Group 1) and Ms. E. Fourtane, medical secretary of the Ethics Committee.

After hearing the rapporteur, examining the documents, and discussing your project, the Ethics Committee analyzed your dossier as follows:

- 1) The objectives of your research are well defined and supported.
- 2) The means implemented to achieve these objectives are described with adequate precision and appear to be well-adapted to solving the problem considered. However, the list of centers participating in this multicenter trial and the investigators' names and curricula vitae are not enclosed in the documentation.
- 3) The foreseeable risks and constraints imposed are not out of proportion with the expected benefits:
  - 3-1. These benefits are important enough on an individual basis to qualify your research as a trial with direct individual benefit.
  - 3.2. The foreseeable risks do not differ from those usually related to this disease.
  - 3.3 There are no constraints other than those currently required in the management of this type of disease.

4) The patient information leaflet and informed consent form call for slight changes:

- Patient information:

- . The term "randomization" could be replaced either with "drawing lots" or "randomly"
- . The first paragraph on the second page should mention that in addition to the samples stored for health care purposes, a portion will be stored, with the patient's consent, for research purposes whenever this is possible.
- . The Ethics Committee/IRB consulted is the Ethics Committee/IRB of Toulouse I.
- . The law on data processing and civil liberties has been modified by the law dated July 1, 1994\*.
- . It should be mentioned that the sponsor has taken out insurance to cover all liability in the event of damages related to the trial.

- In the informed consent form, it should be noted that the Ethics Committee/IRB consulted us the Ethics Committee/IRB of Toulouse I.

Consequently, while giving our:

**APPROVAL**

to carrying out the project, the Ethics Committee/IRB of Toulouse I requests, in accordance with Article L.209-12-1 of the Public Health Act, that you forward the list of centers participating in the trial, the names and curricula vitae of the participating investigators, and a new version of the patient information leaflet and informed consent form. This request is not a condition for the approval given above and does not prevent you from continuing the implementation of your project. The committee/board will get in touch with you only if it does not approve the contents of these documents.

Again in accordance with Article L.209-12-1 of the Public Health Act, the committee/board requests you to forward a copy of documents related to serious adverse events and unexpected events which the trial sponsor must submit to the competent administrative authority, in accordance with Paragraph 6 in Article L.209-12 of the same act.

*(French formal ending to correspondence).*

*(original French text signed)*  
The Chairman  
J.P. Marc-Vergnes

\* related to the processing of personal data for research purposes in the field of health care.

**13-4 PATIENT INFORMATION AND  
INFORMED CONSENT FORM**

# INFORMED CONSENT FORM

## ***A PHASE III STUDY EVALUATING THE BENEFIT OF DOCETAXEL GIVEN SEQUENTIALLY WITH FEC 100 CHEMOTHERAPY TREATMENT IN AXILLARY LYMPH NODE-POSITIVE EARLY BREAST CANCER PATIENTS***

I have received and read a copy of the information leaflet concerning the study on adjuvant chemotherapy in breast cancer.

Dr. .... replied to all my requests for additional information and I have understood the explanations given to me concerning the desired results of the different treatments offered and their foreseeable side effects based on current knowledge.

I have also been informed that the study obtained the approval of the Ethics Committee on the protection of persons involved in biomedical research of Toulouse I and that all precautions have been taken in accordance with the law on data processing and civil liberties.

I fully understand that my participation is voluntary and that I am free to withdraw from the study at any time without giving an explanation and without affecting the quality of my subsequent health care.

I am signing this document, which was given to me in compliance with the legal obligations of current regulatory provisions (Huriet Law No. 88-1138 dated December 20, 1988 and subsequent amendments).

Signed at: ..... on..... 199.....

Investigating physician's name and signature or that of a delegated physician preceded by:  
*Lu et approuvé (Read and approved)*

Patient's name and signature preceded by:  
*Lu et approuvé (Read and approved)*

## *Patient information*

### ***A PHASE III STUDY EVALUATING THE BENEFIT OF DOCETAXEL GIVEN SEQUENTIALLY WITH FEC 100 CHEMOTHERAPY TREATMENT IN AXILLARY LYMPH NODE-POSITIVE EARLY BREAST CANCER PATIENTS***

Dear patient,

You have just undergone surgery for breast cancer, which requires adjuvant chemotherapy. This will significantly decrease the risk of a relapse.

Most physicians currently propose adjuvant chemotherapy involving the combination FEC 100 (6 cycles) consisting of 5-fluorouracil, epirubicin, and cyclophosphamide. This chemotherapy sometimes causes side effects such as:

- ◆ nausea
- ◆ vomiting
- ◆ decreased white blood cells (risk of infection)
- ◆ hair loss
- ◆ impaired heart function (a complete work-up is scheduled before any treatment)
- ◆ fatigue

You will of course benefit from all products needed to prevent these side effects, whenever possible.

Many studies suggest that the addition of docetaxel, a new anticancer agent, can even further reduce the risk of relapse due to its high efficacy. Docetaxel + FEC chemotherapy will be administered as follows:

- three cycles of FEC at three-week intervals, followed by three cycles of docetaxel, also at three-week intervals.

The side effects of docetaxel are usually moderate. The most frequent side effects, apart from those mentioned above for FEC, include a fluid retention syndrome (observed in 10% of the patients at the total dose you will receive) and nail abnormalities.

We invite you to participate, along with 1600 other patients, in a trial whose purpose is to determine whether the combination of docetaxel and FEC is more effective than FEC alone (conventional chemotherapy).

You are of course free to participate in this trial or not.

If you agree to participate in the trial, the decision to administer FEC alone (conventional chemotherapy) or the combination of FEC and docetaxel will be taken randomly.

Furthermore, whenever possible and if you have no objection to this, a tumor tissue specimen and a blood sample will be kept and may be analyzed later on, once the diagnosis of your disease has been established, within the sole framework of scientific research.

We first ask you to sign the enclosed consent form.

By participating in this study, you will make it possible in the future to help people who have the same disease. If you refuse to participate in the trial, you will receive the standard chemotherapy used in the center treating you.

The details of this study have been submitted to the "Ethics Committee on the protection of persons involved in biomedical research" of Toulouse I which verifies that all the conditions required for your protection have been satisfied. The Committee gave its approval on February 17, 1997.

All the information concerning you will be recorded on a computer database and processed confidentially in compliance with the law on data processing and civil liberties (amended by the law dated July 1, 1994).

In compliance with the law, a civil liability insurance has been taken out specifically for this study.

You can have access to computer data concerning you by asking your attending physician. The data will be used anonymously in a final report on the results observed. Your physician is at your disposal to answer any questions you might have concerning this trial.

## **13-5 SERIOUS ADVERSE EVENT REPORT FORM**

REPUBLIC OF FRANCE  
MINISTRY IN CHARGE OF  
HEALTH

*CERFA*  
(Center for the Registration and Revision of Administrative Forms)  
No. 65-0040  
Obligatory form

**REPORTING A SERIOUS ADVERSE EVENT POSSIBLY RELATED TO A  
DRUG OR RELATED PRODUCT\*\***

*(Article L. 209-12. Paragraph 6 of the Public Health Act)*

Report date: \_\_\_/\_\_\_/\_\_\_/

|                                                                                       |                                                                                                                                                                                                                                                                                                                                                                                |  |  |  |  |  |  |
|---------------------------------------------------------------------------------------|--------------------------------------------------------------------------------------------------------------------------------------------------------------------------------------------------------------------------------------------------------------------------------------------------------------------------------------------------------------------------------|--|--|--|--|--|--|
| Sponsor (name or designation and address):                                            | <b>FEDERATION NATIONALE DES CENTRES DE<br/>LUTTE CONTRE LE CANCER<br/>FNCLCC</b><br>(French National Federation of Cancer Treatment Centers)<br>101 Rue de Tolbiac<br>75654 Paris Cedex 13 (France)                                                                                                                                                                            |  |  |  |  |  |  |
| Study title:                                                                          |                                                                                                                                                                                                                                                                                                                                                                                |  |  |  |  |  |  |
| Registration number of the declaration of intent:<br>(assigned by the Administration) | <table border="1" style="display: inline-table; border-collapse: collapse;"> <tr> <td style="width: 20px; height: 15px;"></td> </tr> </table> |  |  |  |  |  |  |
|                                                                                       |                                                                                                                                                                                                                                                                                                                                                                                |  |  |  |  |  |  |

EVENT OBSERVED (Enclose the report on unexpected or toxic effects forwarded by the investigator).

POSSIBLE CONSEQUENCES FOR THE RESEARCH (measures taken or planned)

Send the form by registered mail with a request for acknowledgement of receipt to:

**MINISTERE CHARGE DE LA SANTE**  
(Ministry in charge of Health)  
*Direction de la Pharmacie et du Médicament (DPhM: Pharmacy & Medicines Division)*  
Bureau PH. 8  
1, Place de Fontenoy  
75350 PARIS 07 SP (France)

The Chairman  
(original French text signed)  
H. Pujol.

\*\* related product: product defined in Article L 658- 11 or contraceptive product or object.



**ADDITIONAL REPORT ON A SERIOUS ADVERSE EVENT (SAE) POSSIBLY RELATED TO  
BIOMEDICAL RESEARCH ON A DRUG OR PRODUCT  
(Art. L. 209-12, Paragraph 6, Public Health Code)**

**I. INFORMATION ON THE EVENT**

|                                                                                     |             |                  |       |      |         |        |                     |       |      |                                                  |
|-------------------------------------------------------------------------------------|-------------|------------------|-------|------|---------|--------|---------------------|-------|------|--------------------------------------------------|
| 1. PATIENT No.                                                                      | 1a. COUNTRY | 2. DATE OF BIRTH |       |      | 2a. AGE | 3. SEX | 4-6. ONSET OF EVENT |       |      | 8-12. TICK APPROPRIATE BOXES<br>(serious event): |
|                                                                                     |             | Day              | Month | Year |         |        | Day                 | Month | Year |                                                  |
| 7-13 DESCRIBE THE EVENT (including any examinations and/or laboratory test results) |             |                  |       |      |         |        |                     |       |      |                                                  |

**II. INFORMATION ON SUSPECT MEDICATION(S)**

|                                                     |                          |                                                                                                                                                                |
|-----------------------------------------------------|--------------------------|----------------------------------------------------------------------------------------------------------------------------------------------------------------|
| 14. SUSPECT MEDICATION(S)                           |                          | 20. DID EVENT ABATE AFTER AGENT DISCONTINUATION?<br><input type="radio"/> ...YES <input type="radio"/> ...NO <input type="radio"/> ...NA                       |
| 15. DOSAGE                                          | 16. ADMINISTRATION ROUTE |                                                                                                                                                                |
| 17. THERAPEUTIC INDICATION                          |                          | 21. DID EVENT REAPPEAR AFTER RECHALLENGE?<br><input type="radio"/> ...YES <input type="radio"/> ...NO <input type="radio"/> ...NA<br><br>(NA = not applicable) |
| 18. TREATMENT DATES<br>from                      to | 19. TREATMENT DURATION   |                                                                                                                                                                |
| Medication administered: was the code broken ?      |                          | <input type="radio"/> yes, result ..... <input type="radio"/> no <input type="radio"/> ...NA                                                                   |

**III. CONCOMITANT MEDICATION(S) AND HISTORY**

|                                                                                                    |
|----------------------------------------------------------------------------------------------------|
| 22. CONCOMITANT MEDICATION(S) AND ADMINISTRATION DATES (except for those used to treat event)      |
| 23. RELEVANT HISTORY (e.g.: diseases, allergies, pregnancy with number of gestational weeks, etc.) |

**IV. INFORMATION ON THE SPONSOR**

|                                                                                                                                                                                           |                                                                                                                                                                                                                                                                   |
|-------------------------------------------------------------------------------------------------------------------------------------------------------------------------------------------|-------------------------------------------------------------------------------------------------------------------------------------------------------------------------------------------------------------------------------------------------------------------|
| 24a. SPONSOR'S NAME AND ADDRESS (for France)<br><b>FNCLCC                      101 rue de Tolbiac 75654 Paris 13 (France)</b><br>(French National Federation of Cancer Treatment Centers) | 24b. SPONSOR'S SAE IDENTIFICATION No.:                                                                                                                                                                                                                            |
| 24c. DATE RECEIVED BY SPONSOR                                                                                                                                                             | 24d. REPORT SOURCE <input type="radio"/> biomedical research<br><input type="radio"/> ...trial <input type="radio"/> ...literature <input type="radio"/> ...health professional <input type="radio"/> ...other<br>if applicable, investigator's name and address: |
| DATE OF THIS REPORT                                                                                                                                                                       | 25a. TYPE OF REPORT: <input type="radio"/> ...initial <input type="radio"/> ...follow-up No. :                                                                                                                                                                    |

**V. CONCLUSIONS**

|                                                                                                                                                                                                                             |                                                                                                                                                                                                                           |
|-----------------------------------------------------------------------------------------------------------------------------------------------------------------------------------------------------------------------------|---------------------------------------------------------------------------------------------------------------------------------------------------------------------------------------------------------------------------|
| According to the investigator, the adverse event appears to be related to:<br><br><input type="radio"/> investigational drug<br><input type="radio"/> study protocol<br><input type="radio"/> other, specify:               | According to the sponsor, the adverse event appears to be related to:<br><br><input type="radio"/> investigational drug* (see box below)<br><input type="radio"/> study protocol<br><input type="radio"/> other, specify: |
| * If, according to the sponsor, the adverse event appears to be related to the investigational drug:<br><input type="radio"/> ... the adverse event was expected <input type="radio"/> ... the adverse event was unexpected |                                                                                                                                                                                                                           |
| Sponsor's comments:                                                                                                                                                                                                         |                                                                                                                                                                                                                           |

Name and position of the sponsor's representative  
Date:                      Signature:

## **13-6 WHO INDEX FOR PERFORMANCE STATUS**

**WHO INDEX FOR PERFORMANCE STATUS**

| <b><u>Point</u></b> | <b><u>Description</u></b>                                                    |
|---------------------|------------------------------------------------------------------------------|
| 0                   | Able to carry out all normal activity without restriction.                   |
| 1                   | Restricted in physically strenuous activity                                  |
| 2                   | Ambulatory but unable to carry out any work.<br>(50 % of waking hours)       |
| 3                   | Capable of only limited self-care, confined to bed<br>(50 % of waking hours) |
| 4                   | Completely disabled.<br>Frequently or constantly confined to bed.            |

## **13-7 WHO TOXICITY CRITERIA**

## WHO CRITERIA FOR ACUTE AND SUBACUTE TOXICITY

| LABORATORY                          | GRADE 0                                        | GRADE 1                                                        | GRADE 2                                                       | GRADE 3                                                      | GRADE 4                                       | GRADE 5 |
|-------------------------------------|------------------------------------------------|----------------------------------------------------------------|---------------------------------------------------------------|--------------------------------------------------------------|-----------------------------------------------|---------|
| Hematology (adult)                  | >11.0 g/100 ml<br>(<br>(110 g/l<br>(6.8 mmol/l | 9.5 - 10.9 g/100 ml<br>(<br>(95 - 109 g/l<br>(5.6 - 6.7 mmol/l | 8.0 - 9.4 g/100 ml<br>(<br>(80 - 94 g/l<br>(4.95 - 5.8 mmol/l | 6.5 - 7.9 g/100 ml<br>(<br>(65 - 79 g/l<br>(4.0 - 4.9 mmol/l | < 6.5 g/100 ml<br>(<br>(65 g/l<br>(4.0 mmol/l |         |
| Hemoglobin                          |                                                |                                                                |                                                               |                                                              |                                               |         |
| WBC ( $10^3/\text{mm}^3$ )          | > 4.0                                          | 3.0 - 3.9                                                      | 2.0 - 2.9                                                     | 1.0 - 1.9                                                    | < 1.0                                         |         |
| Granulocytes ( $10^3/\text{mm}^3$ ) | > 2.0                                          | 1.5 - 1.9                                                      | 1.0 - 1.4                                                     | 0.5 - 0.9                                                    | < 0.5                                         |         |
| Platelets ( $10^3/\text{mm}^3$ )    | > 100                                          | 75 - 99                                                        | 50 - 74                                                       | 25 - 49                                                      | < 25                                          |         |
| Hemorrhage                          | none                                           | petechiae                                                      | moderate                                                      | medium                                                       | severe                                        |         |
| <u>GASTROINTESTINAL</u>             |                                                |                                                                |                                                               |                                                              |                                               |         |
| Bilirubin                           | < 1.25 × ULN                                   | 1.26 - 2.5 × ULN                                               | 2.6 - 5 × ULN                                                 | 5.1 - 10 × ULN                                               | > 10 × ULN                                    |         |
| Transaminases                       | < 1.25 × ULN                                   | 1.26 - 2.5 × ULN                                               | 2.6 - 5 × ULN                                                 | 5.1 - 10 × ULN                                               | > 10 × ULN                                    |         |
| Alkaline phosphatase                | < 1.25 × ULN                                   | 1.26 - 2.5 × ULN                                               | 2.6 - 5 × ULN                                                 | 5.1 - 10 × ULN                                               | > 10 × ULN                                    |         |
| <u>UREA</u>                         |                                                |                                                                |                                                               |                                                              |                                               |         |
| BUN or serum creatinine             | < 1.25 × ULN                                   | 1.26 - 2.5 × ULN                                               | 2.6 - 5 × ULN                                                 | 5.1 - 10 × ULN                                               | > 10 × ULN                                    |         |
| PROTEINUREA                         | no change                                      | (1 +<br>(< 0.3 g<br>(< 3 g/l                                   | (2 - 3 +<br>(0.3 - 1.0 g<br>(3 - 10 g/l                       | (4 +<br>(> 1.0 g<br>(> 10 g/l                                | nephrotic syndrome                            |         |
| HEMATURIA                           | no change                                      | microscopic only                                               | gross                                                         | gross and clots                                              | anuria                                        |         |

ULN: upper limit of normal range

## WHO CRITERIA FOR ACUTE AND SUBACUTE TOXICITY

| CLINICAL          | GRADE 0   | GRADE 1                                            | GRADE 2                                          | GRADE 3                                                           | GRADE 4                                                 | GRADE 5 |
|-------------------|-----------|----------------------------------------------------|--------------------------------------------------|-------------------------------------------------------------------|---------------------------------------------------------|---------|
| Pulmonary         | No change | Mild symptoms                                      | Exertional dyspnea                               | Dyspnea at rest                                                   | Confined to bed                                         |         |
| Stomatitis        | No change | Pain                                               | Erythema                                         | Ulcers,<br>Cannot eat solids                                      | Requires parenteral or enteral support for alimentation |         |
| Nausea, vomiting  | None      | Nausea                                             | Transient vomiting                               | Vomiting requiring antiemetic treatment                           | Uncontrollable vomiting                                 |         |
| Diarrhea          | None      | Transient < 2 days                                 | Tolerable > 2 days                               | Intolerable, Requires treatment                                   | Hemorrhagic Dehydration                                 |         |
| Constipation (b)  | None      | Mild                                               | Moderate                                         | Abdominal meteorism                                               | Meteorism and vomiting                                  |         |
| Fever             | None      | < 38°C                                             | 38°C - 40°C                                      | > 40°C                                                            | Fever with hypotension                                  |         |
| Allergic reaction | No change | Edema                                              | Bronchospasm not requiring parenteral medication | Bronchospasm requiring parenteral medication                      | Anaphylaxis                                             |         |
| Skin              | No change | Erythema                                           | Desquamation, vesicles, Pruritus                 | Oozing, Desquamation, Ulcers                                      | Exfoliative dermatitis, Necrosis requiring exeresis     |         |
| Alopecia          | No change | Loss of hair                                       | Moderate alopecia in patches                     | Total alopecia, but reversible                                    | Irreversible alopecia                                   |         |
| Infection         | None      | Mild                                               | Moderate                                         | Severe                                                            | Life-threatening (shock)                                |         |
| Neutotoxicity     |           |                                                    |                                                  |                                                                   |                                                         |         |
| Consciousness     | Alert     | Drowsiness                                         | Drowsiness < 50% of waking hours                 | Drowsiness > 50% of waking hours                                  | Coma                                                    |         |
| Peripheral        | None      | Paresthesia and/or diminished deep tendon reflexes | Severe paresthesia and/or moderate weakness      | Intolerable paresthesia and/or significant impairment of function | Paralysis                                               |         |
| Pain (c)          | None      | Mild                                               | Moderate                                         | Severe                                                            | Intolerable                                             |         |

(b) except for decreased transit due to the use of narcotics

(c) Only pain related to the treatment is taken into account and NOT pain related to the disease.

**13-8 PATHOLOGIC ANATOMY**

**TECHNICAL RECOMMENDATIONS**

|                                                                                                   |
|---------------------------------------------------------------------------------------------------|
| <p style="text-align: center;"><b>PATHOLOGIC ANATOMY</b><br/><b>TECHNICAL RECOMMENDATIONS</b></p> |
|---------------------------------------------------------------------------------------------------|

## **1. STANDARD HISTOPATHOLOGIC EXAMINATION**

The breast tumor must be subjected to a pathologic examination to diagnose malignancy, tumor type, and grade. Other parameters are evaluated such as the exact size, the presence or absence of carcinoma in situ and the existence of vascular emboli.

If the hormone receptors cannot be assayed by biochemical methods, the assay can be carried out using immunohistochemistry on sections of a specimen embedded in paraffin.

The test specimen must be large enough to allow this indispensable step. The fixative of choice is formalin-acetic alcohol rather than neutral buffered formalin or Dubosq-Brazil solution. Bouin's fluid should be avoided.

In addition, two tissue samples must be located and collected:

- one in the vicinity of the tumor and possibly spanning tumor tissue and healthy tissue: it must permit a subsequent study of prognostic factors in the stroma response,
- the other distally in the uninvolved breast tissue, to serve as a reference.

## **2. A TUMOR FRAGMENT MUST BE STORED FOR SUBSEQUENT LABORATORY TESTS**

A sample measuring at least 5 mm taken from fresh tumor tissue should be frozen at below 80°C (using the method of isopentane supercooled in liquid nitrogen) and stored in a tumor storage cryostat (low temperature freezer at -80° or in a liquid nitrogen container at -196°).

Unlike the samples intended for biochemical assay of hormone receptors (whenever possible), this additional sample will be used to study prognostic and predictive factors concerning treatment efficacy.

## **3. AXILLARY DISSECTION**

All the lymph nodes from the axillary dissection must be examined under a microscope.

Lymph nodes that are clearly invaded microscopically are sampled in a single complete representative section. The presence of capsule rupture must be reported.

All the other lymph nodes must be sectioned and examined entirely.



To be considered reliable, the prognostic information from a histopathologic examination of an axillary dissection must involve at least ten lymph nodes. However, the presence of five lymph nodes, at least one of which is invaded, is sufficient for patient inclusion in the present study. The axillary lymph node dissection can be oriented using surgical reference marks. (see Standards, options, and recommendations, Vol. 3, early breast cancer, *CLCC - Cancer Treatment Centers*, 1996).

#### **4. BLOOD SAMPLES**

Likewise, a blood sample must be collected before any systemic treatment.

The serum must be stored in a low-temperature freezer, if possible in the same location as the tissue fragment.
